# Supplementary material for: Flavonoid Derivatives as New Potent Inhibitors of Cysteine Proteases: An Important Step toward the Design of New Compounds for the Treatment of Leishmaniasis
Source: MDPI journal article supplement (doi:10.3390/microorganisms11010225), 2023-01-16
Supplement: s1 [file s1]

## Supplementary Material

# Flavonoid derivatives as new potent inhibitors of cysteine proteases: An important step toward the design of new compounds for the treatment of leishmaniasis

Estela Mariana Guimarães Lourenço<sup>1</sup>, Juliana Fortes Di Iório<sup>2</sup>, Fernanda da Silva<sup>3</sup>, Felipe Leonardo Bley Fialho<sup>1</sup>, Melquisedeque Mateus Monteiro<sup>4</sup>, Adilson Beatriz<sup>1</sup>, Renata Trentin Perdomo<sup>4</sup>, Euzébio Guimarães Barbosa<sup>5</sup>, Jean Pierre Oses,<sup>6</sup> Carla Cardozo Pinto de Arruda<sup>3</sup>, Wagner Alves de Souza Júdice<sup>2,\*</sup>, Jamal Rafique<sup>1,7\*</sup>, Dênis Pires de Lima<sup>1,\*</sup>

- <sup>1</sup> Laboratory of Synthesis and Transformation of Organic Molecules - SINTMOL, Institute of Chemistry, Universidade Federal de Mato Grosso do Sul, Av. Senador Filinto Muller, 1555, Campo Grande, MS, Brazil
- <sup>2</sup> Centro Interdisciplinar de Investigação Bioquímica (CIIB), Universidade de Mogi das Cruzes (UMC), Mogi das Cruzes, SP, Brazil
- <sup>3</sup> Laboratório de Parasitologia Humana, Instituto de Biociências, Universidade Federal de Mato Grosso do Sul, Campo Grande, MS, Brazil
- <sup>4</sup> Laboratory of Molecular Biology and Cell Culture, School of Pharmaceutical Sciences, Food Technology, and Nutrition, Universidade Federal de Mato Grosso do Sul, Campo Grande, MS, Brazil
- <sup>5</sup> Laboratório de Química Farmacêutica Computacional, Departamento de Farmácia, Universidade Federal do Rio Grande do Norte, Natal, Brazil
- <sup>6</sup> Laboratório de Neurociências, Instituto de Biociências, Universidade Federal do Rio Grande, Rio Grande, RS, Brazil.
- <sup>7</sup> Instituto de Química, Universidade Federal de Goiás - UFG, Goiânia, 74690-900, GO-Brazil

\* Correspondence:

[wagnerjudice@gmail.com](mailto:wagnerjudice@gmail.com) (WASJ)

[jamal.chm@gmail.com](mailto:jamal.chm@gmail.com); [jamal.rafique@ufms.br](mailto:jamal.rafique@ufms.br) (JR)

[denis.lima@ufms.br](mailto:denis.lima@ufms.br) (DPL)

## Summary

|                                                                                                                             |                                     |
|-----------------------------------------------------------------------------------------------------------------------------|-------------------------------------|
| <b>Figure S1:</b> Determination of the affinity constants of the <b>3c</b> compound in the inhibition of rCPB2.8.....       | 3                                   |
| <b>Figure S2:</b> Determination of the affinity constants of the <b>f12a</b> compound in the inhibition of rCPB2.8.....     | 3                                   |
| <b>Figure S3:</b> Determination of the affinity constants of the <b>f12b</b> compound in the inhibition of rCPB2.8.....     | 4                                   |
| <b>Figure S4:</b> Determination of the affinity constants of the <b>3c</b> compound in the inhibition of rCPB3.....         | 4                                   |
| <b>Figure S5:</b> Determination of the affinity constants of the <b>f12a</b> compound in the inhibition of rCPB3.....       | 5                                   |
| <b>Figure S6:</b> Determination of the affinity constants of the <b>f12b</b> compound in the inhibition of rCPB3.....       | 5                                   |
| <b>Figure S7:</b> Determination of the affinity constants of the <b>3c</b> compound in the inhibition of rH84Y.....         | 6                                   |
| <b>Figure S8:</b> Determination of the affinity constants of the <b>f12a</b> compound in the inhibition of rH84Y.....       | 6                                   |
| <b>Figure S9:</b> Determination of the affinity constants of the <b>f12b</b> compound in the inhibition of rH84Y.....       | 7                                   |
| <b>Table S1:</b> Differences of amino acid residues at the active site of rCPB2.8, rCPB3 and rH84Y.....                     | <b>Error! Bookmark not defined.</b> |
| <b>Table S2:</b> Potential energy values for the biding positions of compound <b>3c</b> at the active site of rCPB2.8 ..... | 9                                   |
| <b>Table S3:</b> Potential energy values for the biding positions of compound f12a at the active site of rCPB3a.....        | 9                                   |
| <b>Figure S10:</b> Cytotoxicity of all flavonoid derivatives against NHI-3T3 cells.....                                     | 9                                   |
| <b>NMR spectra section</b> .....                                                                                            | 10                                  |

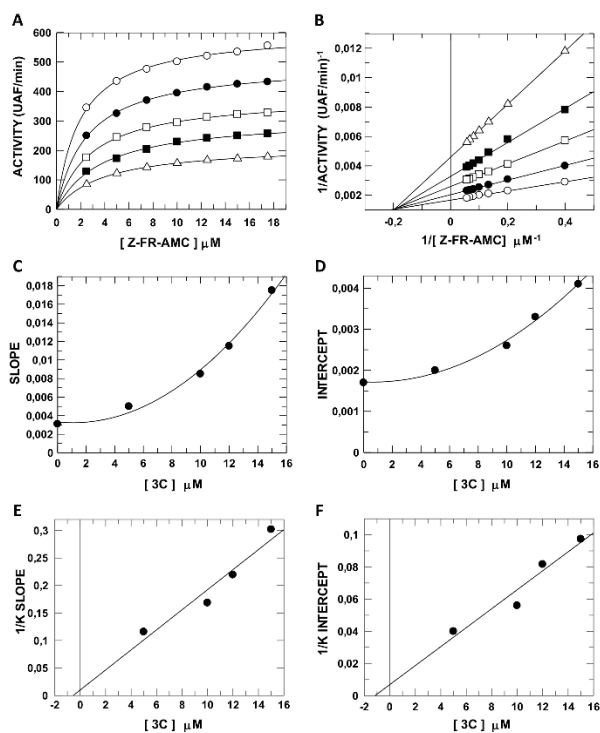

A: Michaelis-Menten plot; B: Lineweaver-Burk plot; C: Slope replot; D: Intercept replot; E:  $1/K_{\text{Slope}}$  replot; F:  $1/K_{\text{Intercept}}$  replot.  $\circ \rightarrow$  control;  $\bullet \rightarrow 5 \mu\text{M}$ ;  $\bullet \rightarrow 10 \mu\text{M}$ ;  $\blacksquare \rightarrow 12 \mu\text{M}$ ;  $\triangle \rightarrow 15 \mu\text{M}$

**Figure S1:** Determination of the affinity constants of the 3c compound in the inhibition of rCPB2.8

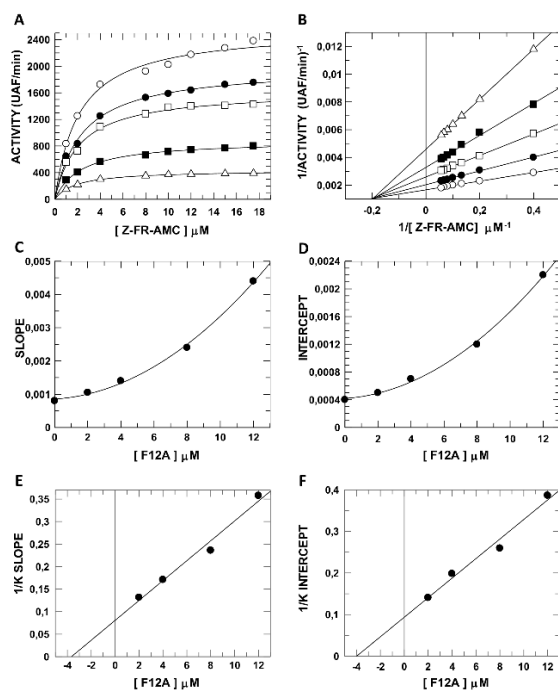

A: Michaelis-Menten plot; B: Lineweaver-Burk plot; C: Slope replot; D: Intercept replot; E:  $1/K_{\text{Slope}}$  replot; F:  $1/K_{\text{Intercept}}$  replot.  $\circ \rightarrow$  control;  $\bullet \rightarrow 2 \mu\text{M}$ ;  $\bullet \rightarrow 4 \mu\text{M}$ ;  $\blacksquare \rightarrow 8 \mu\text{M}$ ;  $\triangle \rightarrow 12 \mu\text{M}$

**Figure S2:** Determination of the affinity constants of f12a compound in the inhibition of rCPB2.8.

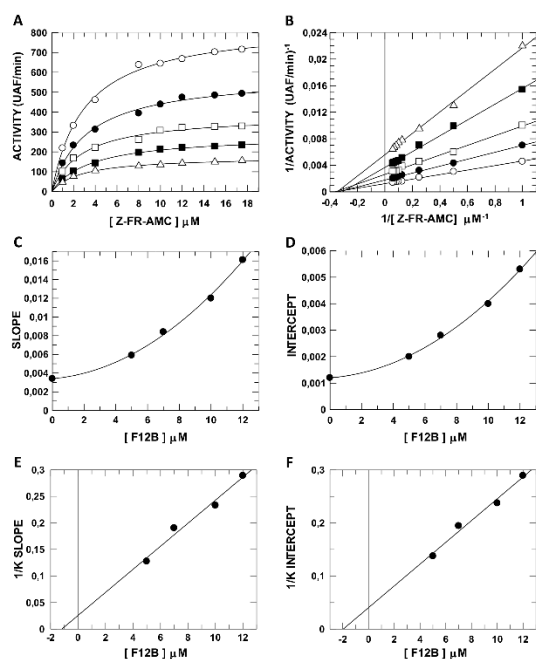

A: Michaelis-Menten plot; B: Lineweaver-Burk plot; C: Slope replot; D: Intercept replot; E:  $1/K_{\text{slope}}$  replot; F:  $1/K_{\text{Intercept}}$  replot.  $\circ \rightarrow$  control;  $\bullet \rightarrow 5 \mu\text{M}$ ;  $\bullet \rightarrow 7 \mu\text{M}$ ;  $\blacksquare \rightarrow 10 \mu\text{M}$ ;  $\triangle \rightarrow 12 \mu\text{M}$

**Figure S3:** Determination of the affinity constants of the **f12b** compound in the inhibition of rCPB2.8.

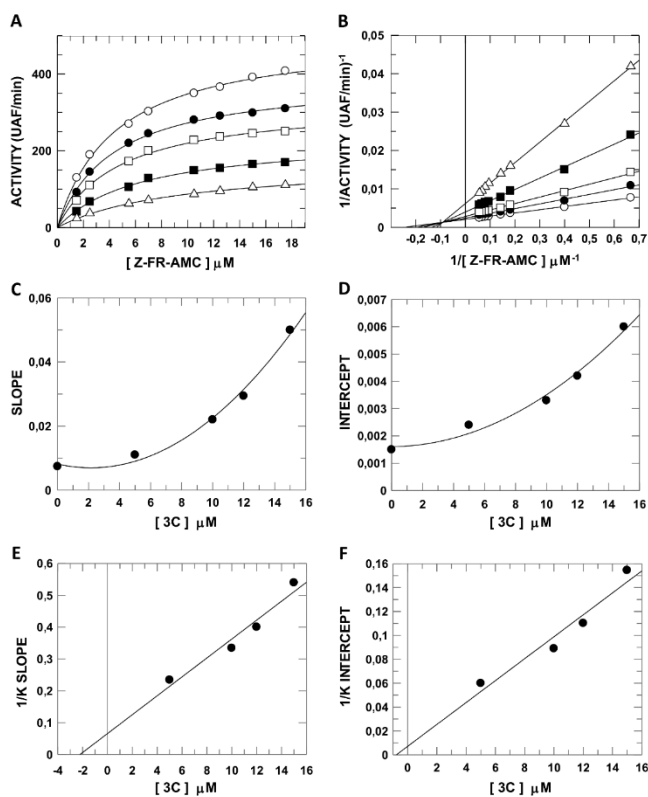

A: Michaelis-Menten plot; B: Lineweaver-Burk plot; C: Slope replot; D: Intercept replot; E:  $1/K_{\text{slope}}$  replot; F:  $1/K_{\text{Intercept}}$  replot.  $\circ \rightarrow$  control;  $\bullet \rightarrow 5 \mu\text{M}$ ;  $\bullet \rightarrow 10 \mu\text{M}$ ;  $\blacksquare \rightarrow 12 \mu\text{M}$ ;  $\triangle \rightarrow 15 \mu\text{M}$

**Figure S4:** Determination of the affinity constants of the **3c** compound in the inhibition of rCPB3.

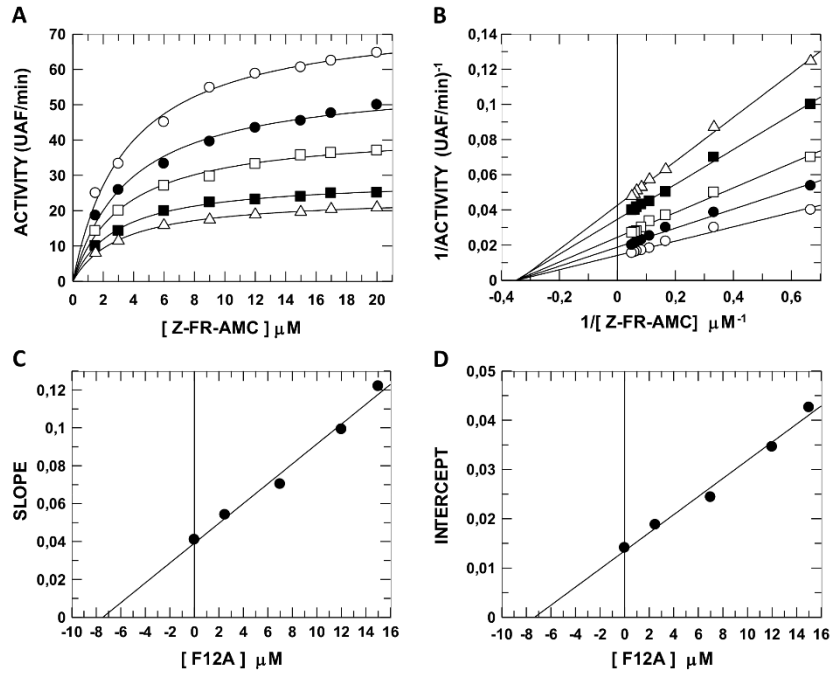

A: Michaelis-Menten plot; B: Lineweaver-Burk plot; C: Slope replot; D: Intercept replot; E:  $1/K_{\text{Slope}}$  replot; F:  $1/K_{\text{Intercept}}$  replot.  $\circ \rightarrow$  control;  $\bullet \rightarrow 2.5 \mu\text{M}$ ;  $\bullet \rightarrow 7 \mu\text{M}$ ;  $\blacksquare \rightarrow 12 \mu\text{M}$ ;  $\triangle \rightarrow 15 \mu\text{M}$

**Figure S5:** Determination of the affinity constants of the **f12a** compound in the inhibition of rCPB3.

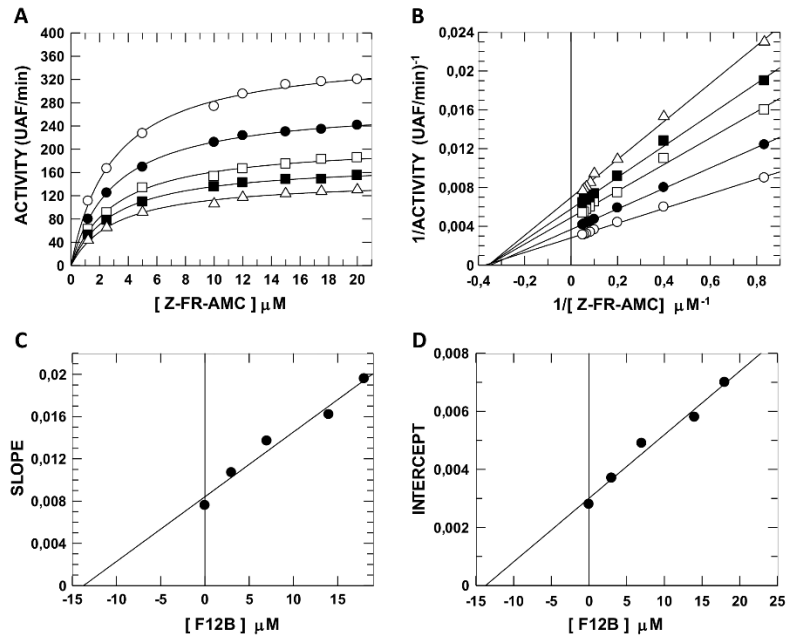

A: Michaelis-Menten plot; B: Lineweaver-Burk plot; C: Slope replot; D: Intercept replot; E:  $1/K_{\text{Slope}}$  replot; F:  $1/K_{\text{Intercept}}$  replot.  $\circ \rightarrow$  control;  $\bullet \rightarrow 3 \mu\text{M}$ ;  $\bullet \rightarrow 7 \mu\text{M}$ ;  $\blacksquare \rightarrow 14 \mu\text{M}$ ;  $\triangle \rightarrow 18 \mu\text{M}$

**Figure S6:** Determination of the affinity constants of the **f12b** compound in the inhibition of rCPB3.

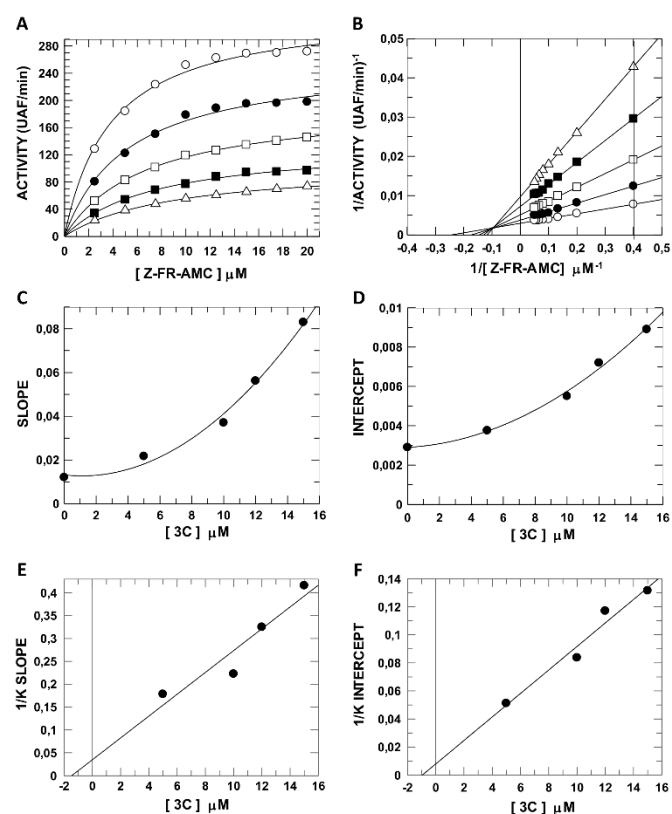

A: Michaelis-Menten plot; B: Lineweaver-Burk plot; C: Slope replot; D: Intercept replot; E:  $1/K_{\text{Slope}}$  replot; F:  $1/K_{\text{Intercept}}$  replot.  $\circ \rightarrow$  control;  $\bullet \rightarrow 5 \mu\text{M}$ ;  $\bullet \rightarrow 10 \mu\text{M}$ ;  $\blacksquare \rightarrow 12 \mu\text{M}$ ;  $\triangle \rightarrow 15 \mu\text{M}$

**Figure S7:** Determination of the affinity constants of the **3c** compound in the inhibition of rH84Y.

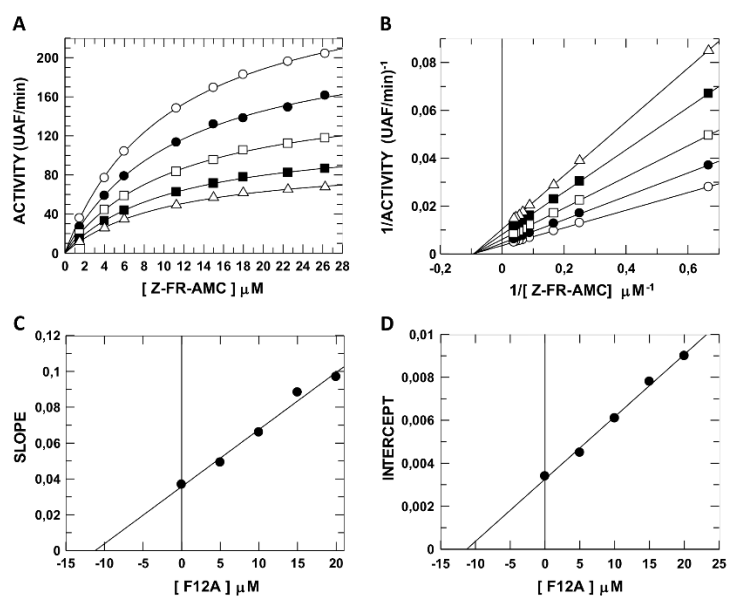

A: Michaelis-Menten plot; B: Lineweaver-Burk plot; C: Slope replot; D: Intercept replot; E:  $1/K_{\text{Slope}}$  replot; F:  $1/K_{\text{Intercept}}$  replot.  $\circ \rightarrow$  control;  $\bullet \rightarrow 5 \mu\text{M}$ ;  $\bullet \rightarrow 10 \mu\text{M}$ ;  $\blacksquare \rightarrow 15 \mu\text{M}$ ;  $\triangle \rightarrow 20 \mu\text{M}$

**Figure S8:** Determination of the affinity constants of the **f12a** compound in the inhibition of rH84Y.

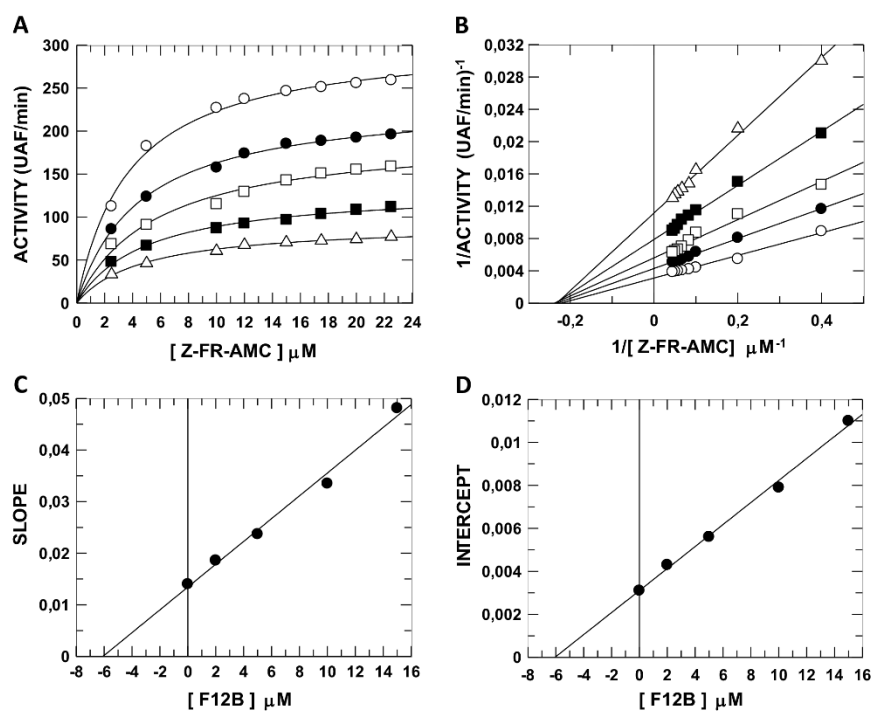

A: Michaelis-Menten plot; B: Lineweaver-Burk plot; C: Slope replot; D: Intercept replot; E:  $1/K_{\text{slope}}$  replot; F:  $1/K_{\text{intercept}}$  replot.  $\circ \rightarrow$  control;  $\bullet \rightarrow$  2  $\mu\text{M}$ ;  $\bullet \rightarrow$  5  $\mu\text{M}$ ;  $\blacksquare \rightarrow$  10  $\mu\text{M}$ ;  $\triangle \rightarrow$  15  $\mu\text{M}$

**Figure S9:** Determination of the affinity constants of the **f12b** compound in the inhibition of rH84Y.

**Table S1:** Differences of amino acid residues at the active site of rCPB2.8, rCPB3 and rH84Y

| Enzyme <sup>1</sup> | Amino acid residues of active site <sup>2</sup> |     |     |     |     |
|---------------------|-------------------------------------------------|-----|-----|-----|-----|
|                     | 143                                             | 185 | 186 | 189 | 209 |
| rCPB2.8             | ASN                                             | ASP | ASP | ASP | HIS |
| rCPB3               | ASP                                             | ASN | SER | SER | HIS |
| rH84Y               | ASP                                             | ASN | SER | SER | TYR |

<sup>1</sup>The number of amino acid residue may change depends on the crystal structure. <sup>2</sup>All of three isoforms are recombinant enzymes (r) lacking the C-terminal region.

**Table S2:** Potential energy values for the binding positions of compound **3c** at the active site of rCPB2.8<sup>a</sup>

| Positions | Potential energy | $\Delta_{\text{Energy}}$ |
|-----------|------------------|--------------------------|
| 1         | -58282           | 4751                     |
| 2         | -105794          | 0                        |
| 3         | -90651           | 1514                     |
| 4         | -101704          | 409                      |
| 5         | -98316           | 747                      |
| 6         | -52679           | 5312                     |
| 7         | -50644           | 5515                     |
| 8         | -53940           | 51854                    |

*a*: All values are expressed in kcal mol<sup>-1</sup>

**Table S3:** Potential energy values for the binding positions of compound **f12a** at the active site of rCPB3<sup>a</sup>

| Positions | Potential energy | $\Delta_{\text{Energy}}$ |
|-----------|------------------|--------------------------|
| 1         | -106212          | 586                      |
| 2         | -62477           | 44321                    |
| 3         | -106398          | 400                      |
| 4         | -97614           | 9184                     |
| 5         | -106798          | 0                        |
| 6         | -103814          | 2984                     |
| 7         | -103849          | 2949                     |
| 8         | -106176          | 622                      |

*a*: All values are expressed in kcal mol<sup>-1</sup>



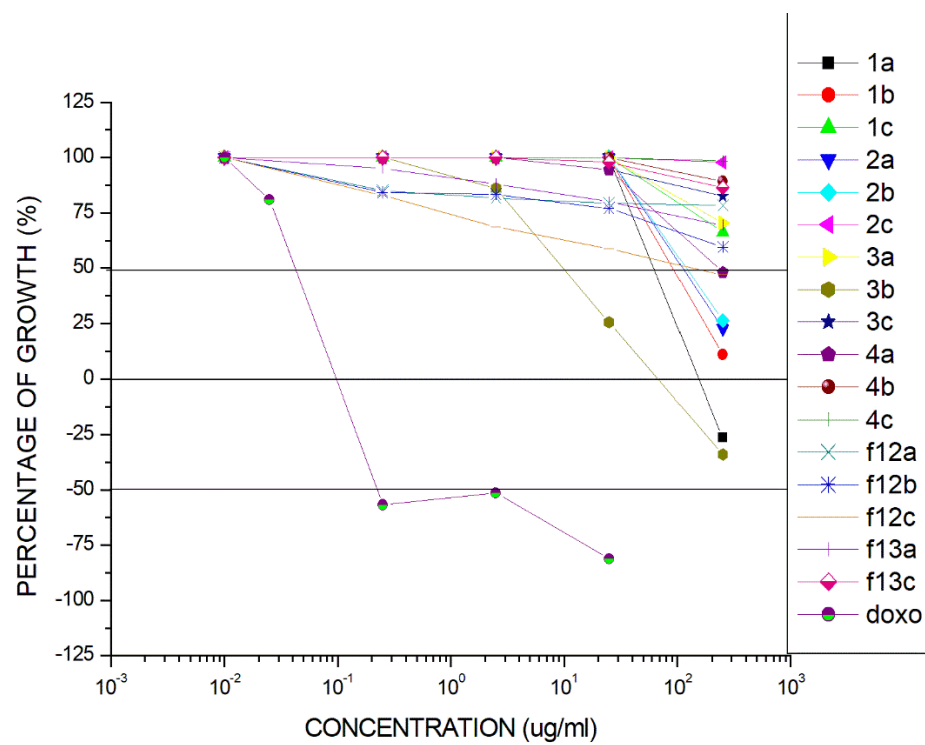

**Figure S10:** Cytotoxicity of all flavonoid derivatives against NHI-3T3 cells

## NMR spectra section

|                                                                      |    |
|----------------------------------------------------------------------|----|
| <b>Spectra 1:</b> $^1\text{H}$ NMR of compound <b>1a</b> .....       | 11 |
| <b>Spectra 2:</b> $^{13}\text{C}$ NMR of compound <b>1a</b> .....    | 11 |
| <b>Spectra 3:</b> $^1\text{H}$ NMR of compound <b>1b</b> .....       | 12 |
| <b>Spectra 4:</b> $^{13}\text{C}$ NMR of compound <b>1b</b> .....    | 12 |
| <b>Spectra 5:</b> $^1\text{H}$ NMR of compound <b>1c</b> .....       | 13 |
| <b>Spectra 6:</b> $^{13}\text{C}$ NMR of compound <b>1c</b> .....    | 13 |
| <b>Spectra 7:</b> $^1\text{H}$ NMR of compound <b>2a</b> .....       | 14 |
| <b>Spectra 8:</b> $^{13}\text{C}$ NMR of compound <b>2a</b> .....    | 14 |
| <b>Spectra 9:</b> $^1\text{H}$ NMR of compound <b>2b</b> .....       | 15 |
| <b>Spectra 10:</b> $^{13}\text{C}$ NMR of compound <b>2b</b> .....   | 15 |
| <b>Spectra 11:</b> $^1\text{H}$ NMR of compound <b>2c</b> .....      | 16 |
| <b>Spectra 12:</b> $^{13}\text{C}$ NMR of compound <b>2c</b> .....   | 16 |
| <b>Spectra 13:</b> $^1\text{H}$ NMR of compound <b>3a</b> .....      | 17 |
| <b>Spectra 14:</b> $^{13}\text{C}$ NMR of compound <b>3a</b> .....   | 17 |
| <b>Spectra 15:</b> $^1\text{H}$ NMR of compound <b>3b</b> .....      | 18 |
| <b>Spectra 16:</b> $^{13}\text{C}$ NMR of compound <b>3b</b> .....   | 18 |
| <b>Spectra 17:</b> $^1\text{H}$ NMR of compound <b>3c</b> .....      | 19 |
| <b>Spectra 18:</b> $^{13}\text{C}$ NMR of compound <b>3c</b> .....   | 19 |
| <b>Spectra 19:</b> $^1\text{H}$ NMR of compound <b>4a</b> .....      | 20 |
| <b>Spectra 20:</b> $^{13}\text{C}$ NMR of compound <b>4a</b> .....   | 20 |
| <b>Spectra 21:</b> $^1\text{H}$ NMR of compound <b>4b</b> .....      | 21 |
| <b>Spectra 22:</b> $^{13}\text{C}$ NMR of compound <b>4b</b> .....   | 21 |
| <b>Spectra 23:</b> $^1\text{H}$ NMR of compound <b>4c</b> .....      | 22 |
| <b>Spectra 24:</b> $^{13}\text{C}$ NMR of compound <b>4c</b> .....   | 22 |
| <b>Spectra 25:</b> $^1\text{H}$ NMR of compound <b>f12a</b> .....    | 23 |
| <b>Spectra 26:</b> $^{13}\text{C}$ NMR of compound <b>f12a</b> ..... | 23 |
| <b>Spectra 27:</b> $^1\text{H}$ NMR of compound <b>f1b</b> .....     | 24 |
| <b>Spectra 28:</b> $^{13}\text{C}$ NMR of compound <b>f12b</b> ..... | 24 |
| <b>Spectra 29:</b> $^1\text{H}$ NMR of compound <b>f1c</b> .....     | 25 |
| <b>Spectra 30:</b> $^{13}\text{C}$ NMR of compound <b>f12c</b> ..... | 25 |
| <b>Spectra 31:</b> $^1\text{H}$ NMR of compound <b>f3a</b> .....     | 26 |
| <b>Spectra 32:</b> $^{13}\text{C}$ NMR of compound <b>f13a</b> ..... | 26 |
| <b>Spectra 33:</b> $^1\text{H}$ NMR of compound <b>f3c</b> .....     | 27 |
| <b>Spectra 34:</b> $^{13}\text{C}$ NMR of compound <b>f13c</b> ..... | 27 |

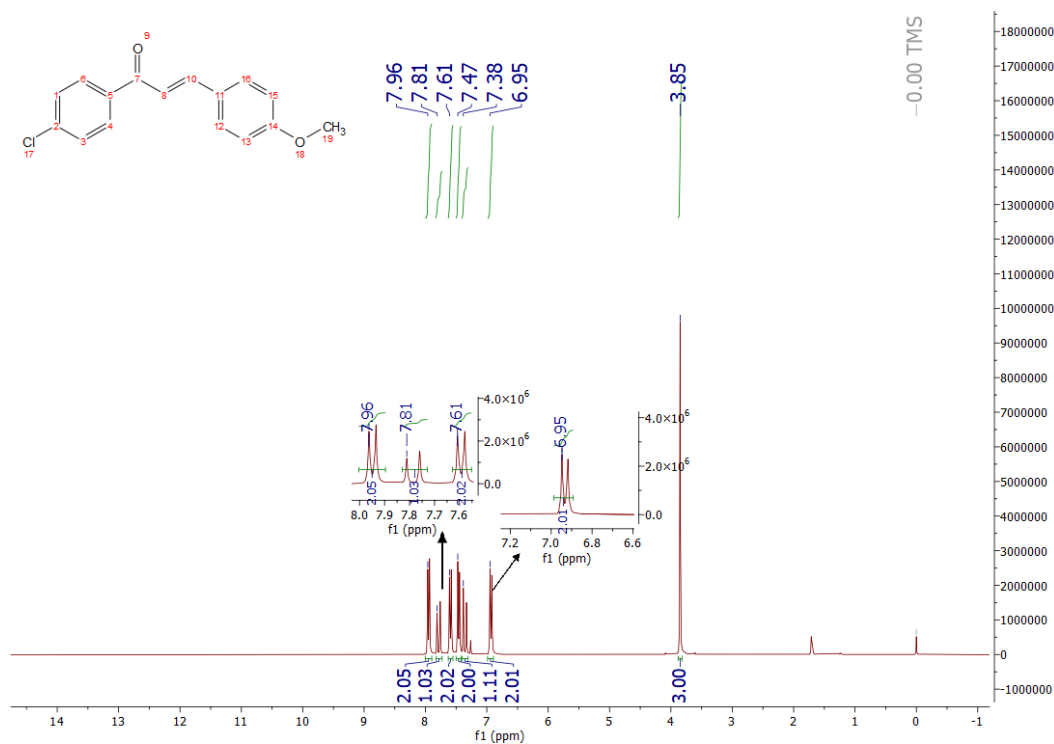

Spectra 1: <sup>1</sup>H NMR of compound 1a

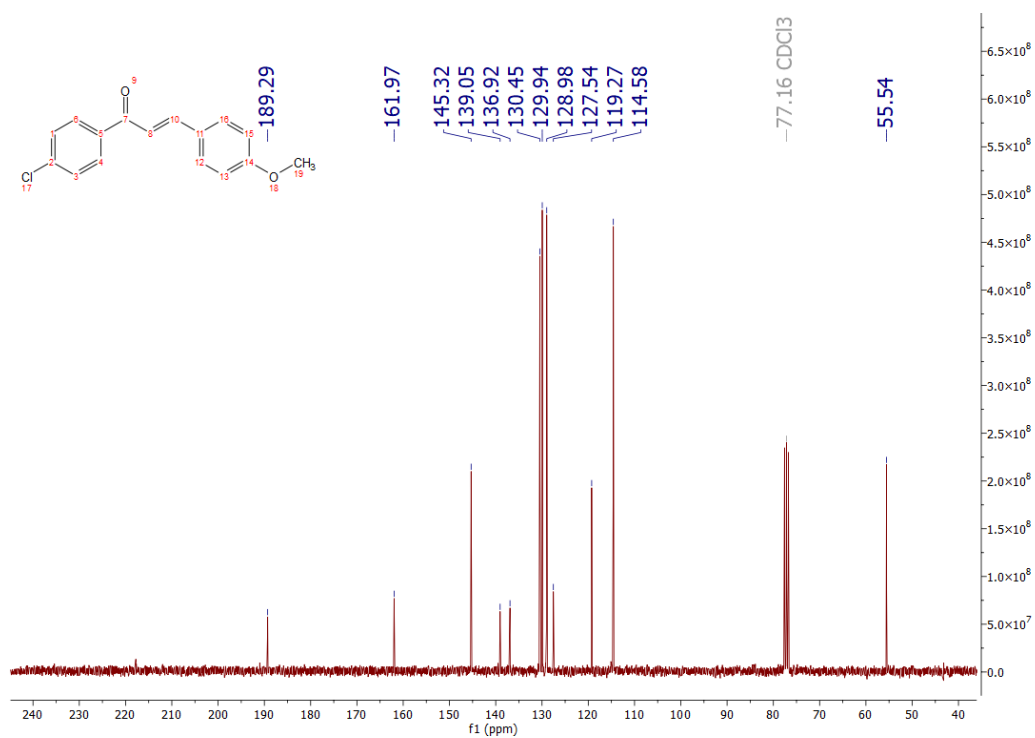

Spectra 2: <sup>13</sup>C NMR of compound 1a

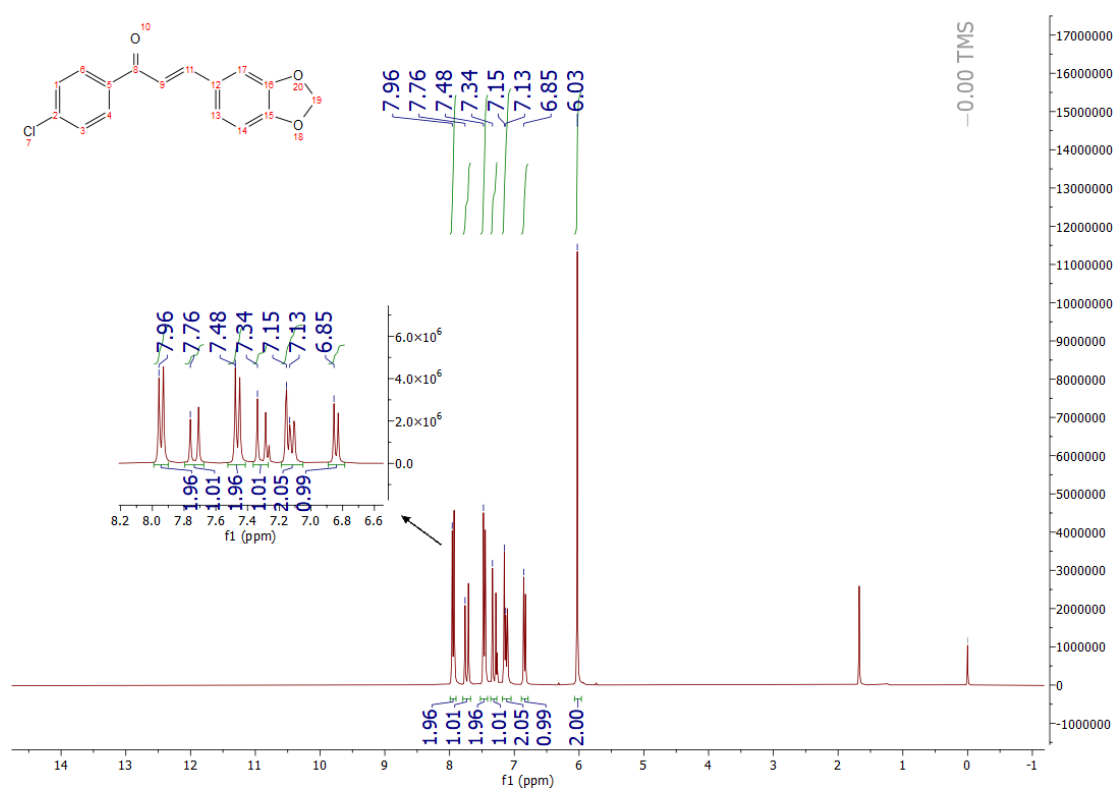

**Spectra 3:** <sup>1</sup>H NMR of compound **1b**

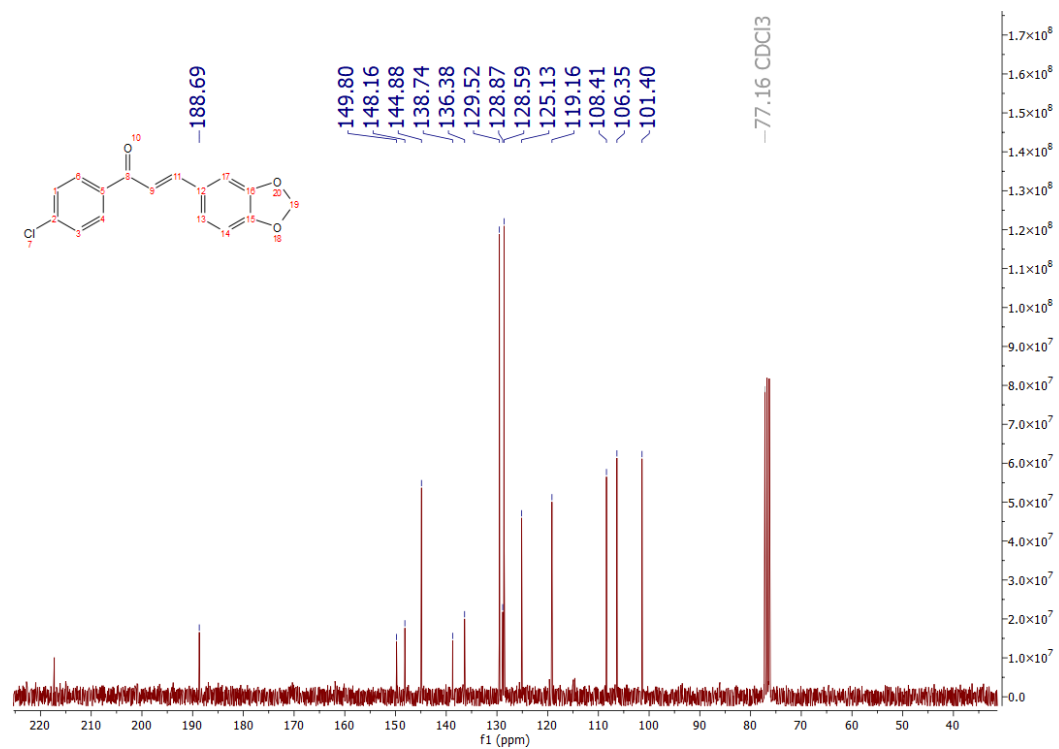

**Spectra 4:** <sup>13</sup>C NMR of compound **1b**

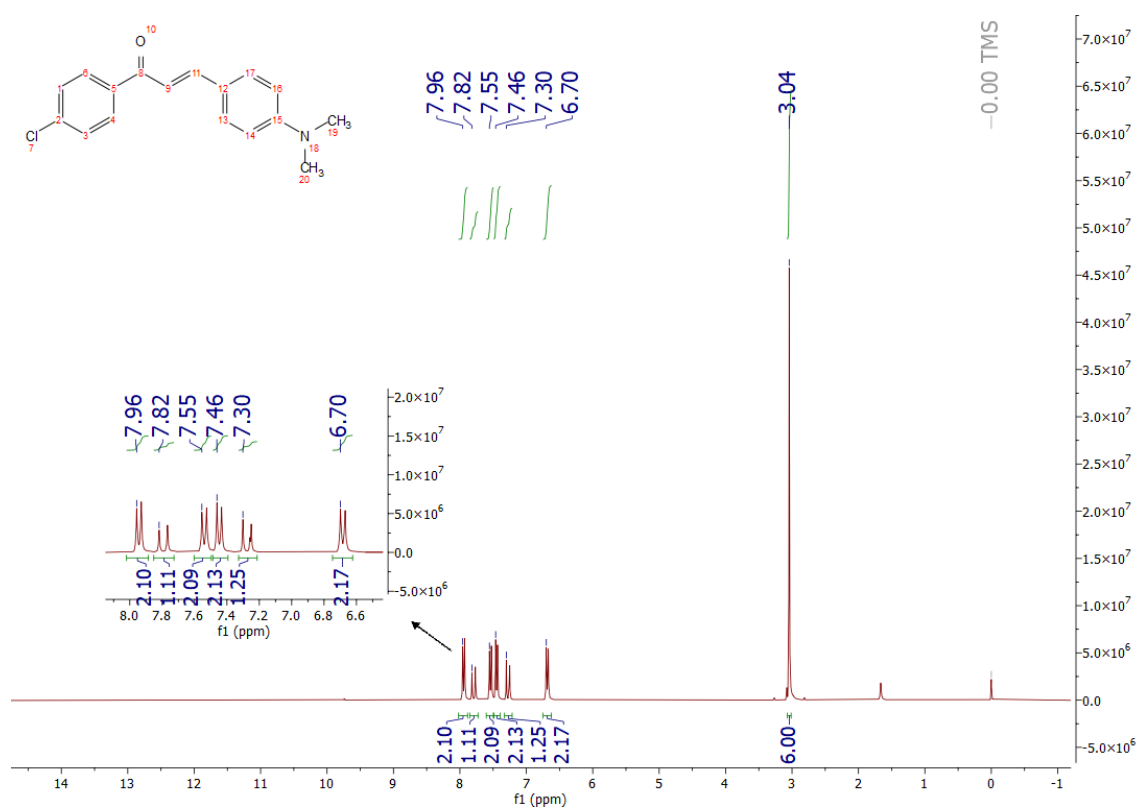

**Spectra 5:** <sup>1</sup>H NMR of compound **1c**

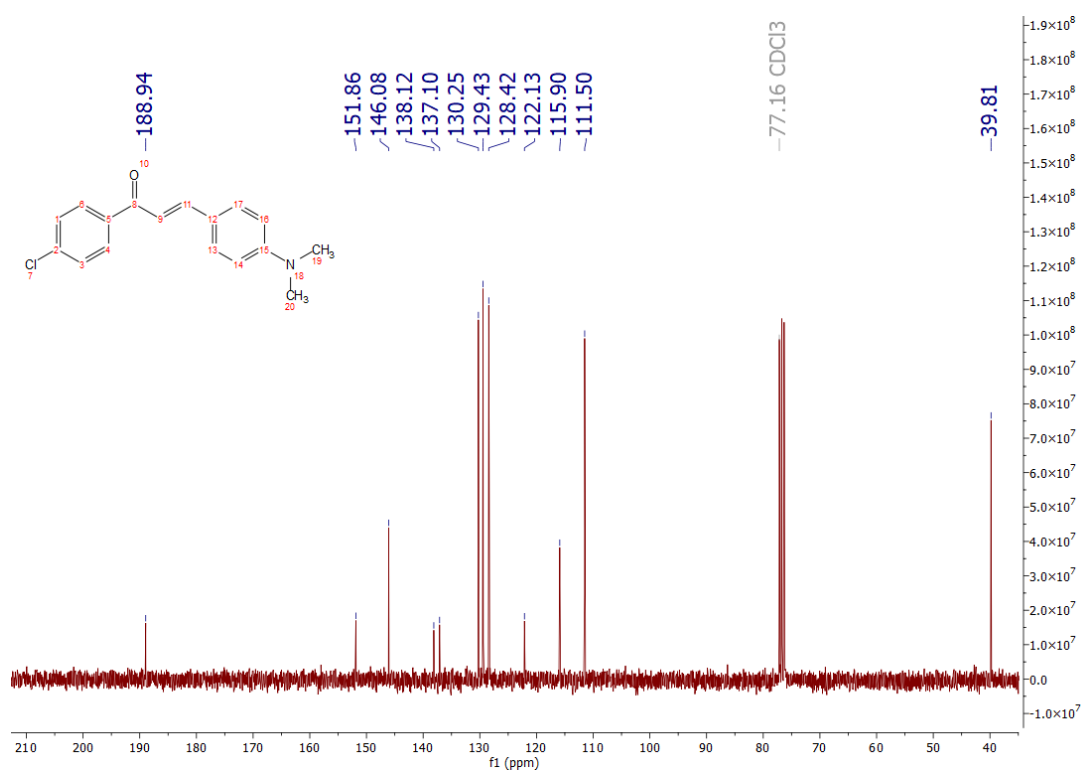

**Spectra 6:** <sup>13</sup>C NMR of compound **1c**

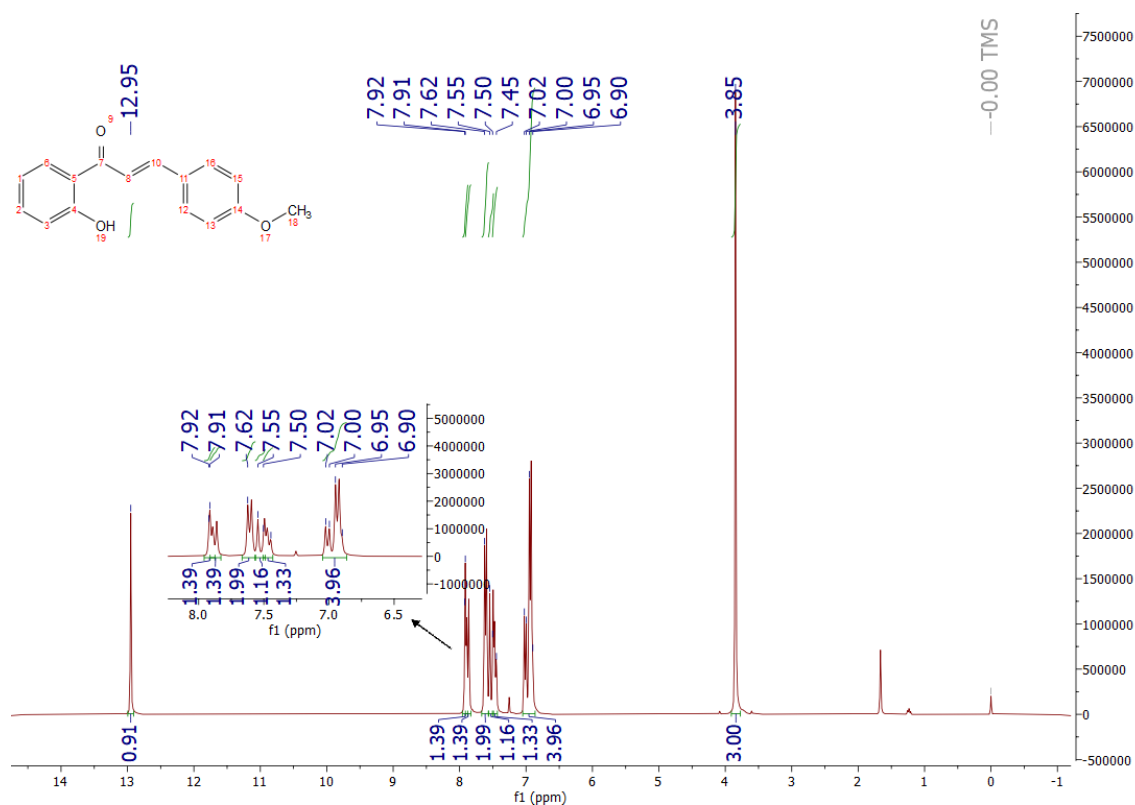

**Spectra 7:** <sup>1</sup>H NMR of compound 2a

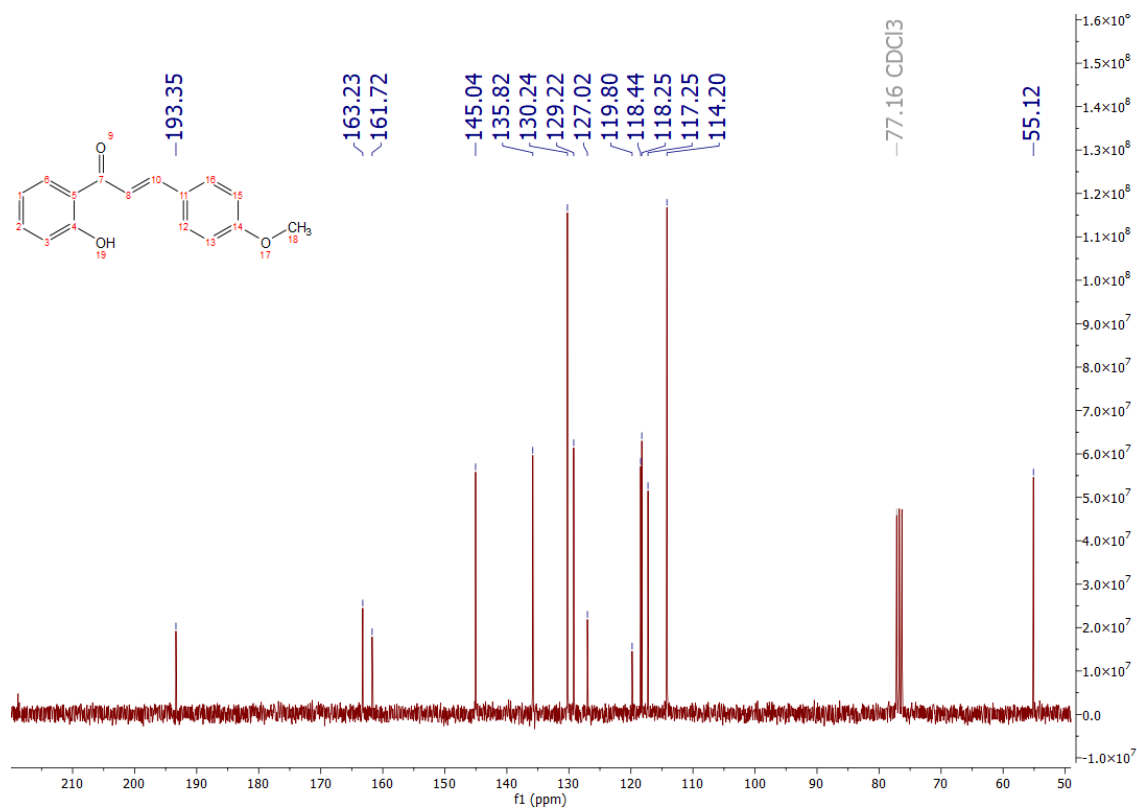

**Spectra 8:** <sup>13</sup>C NMR of compound 2a

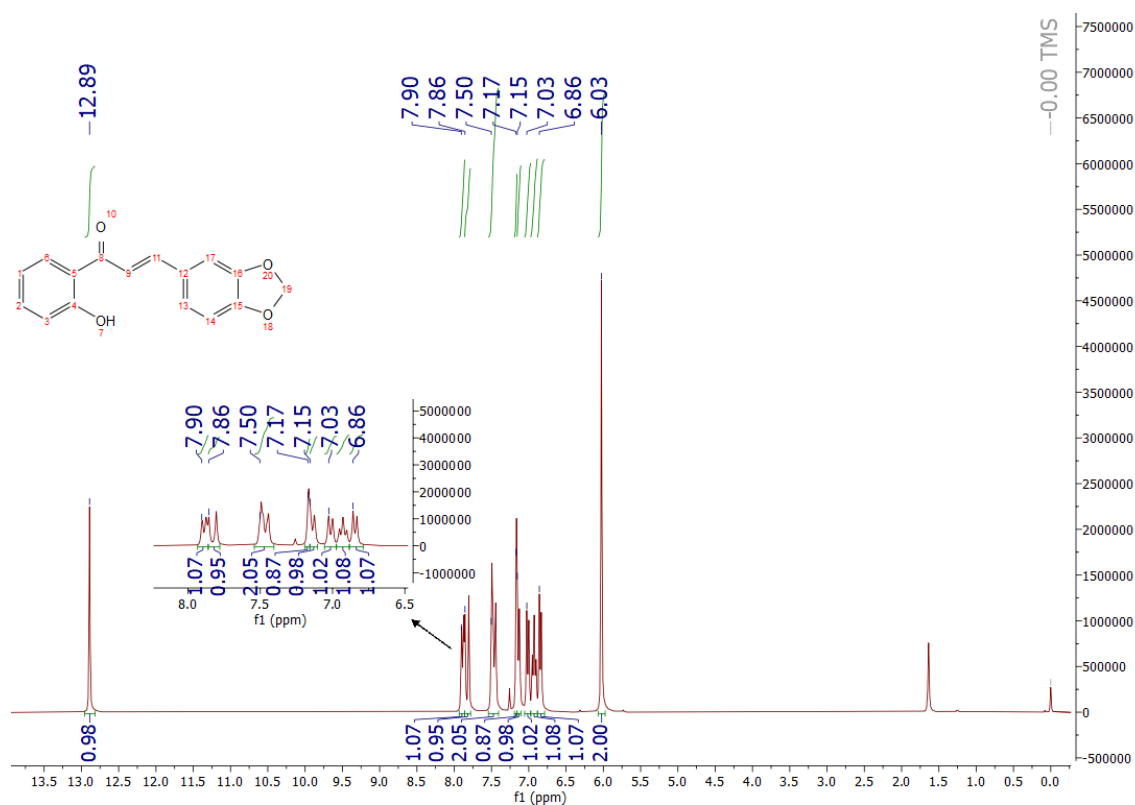

**Spectra 9:** <sup>1</sup>H NMR of compound **2b**

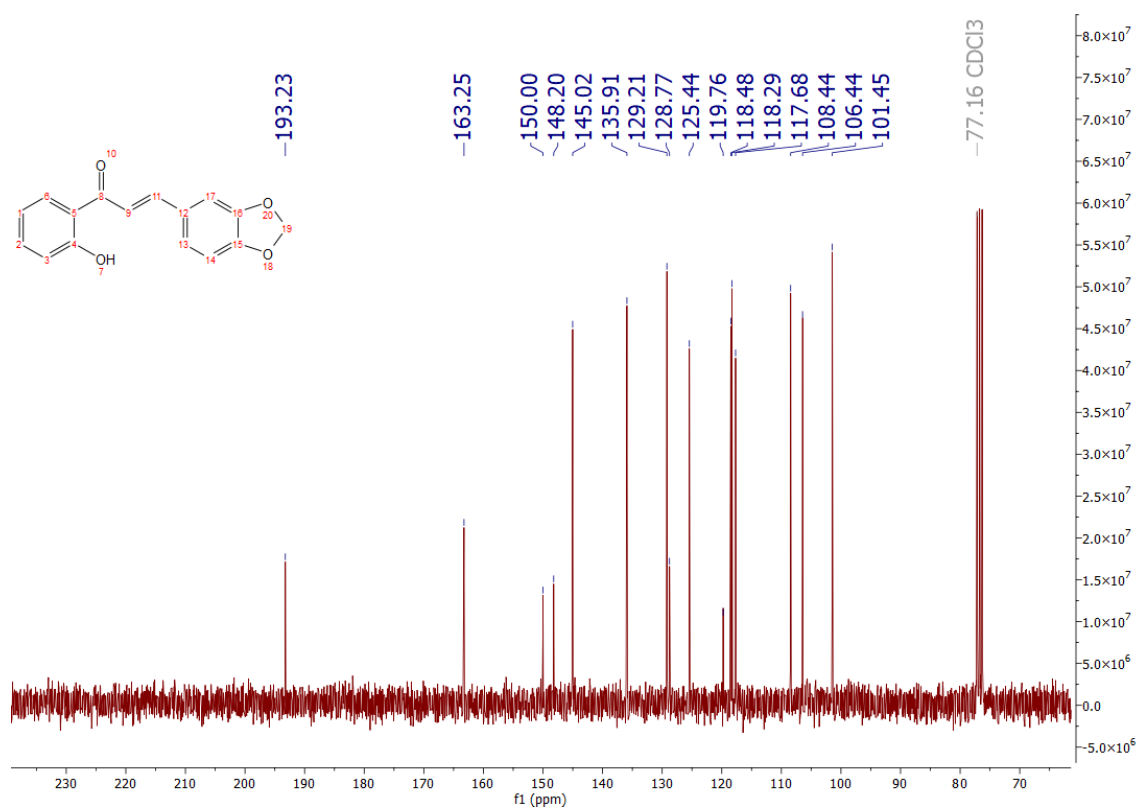

**Spectra 10:** <sup>13</sup>C NMR of compound **2b**

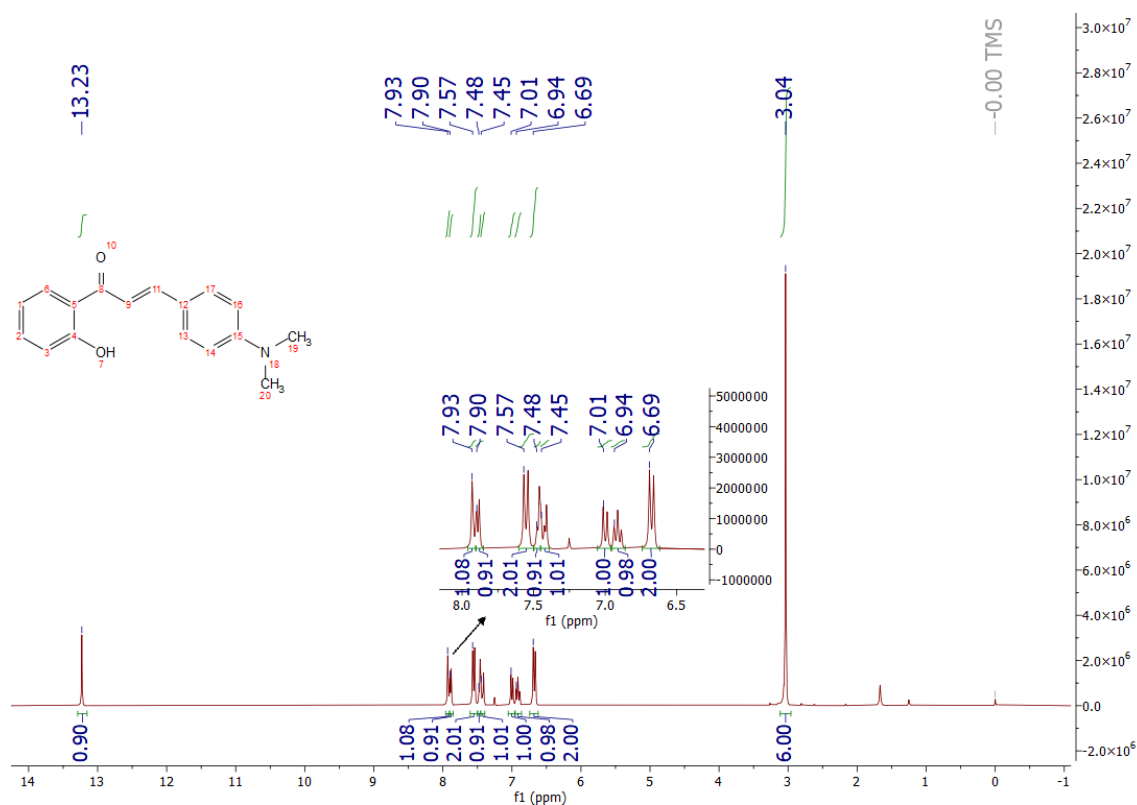

**Spectra 11:** <sup>1</sup>H NMR of compound **2c**

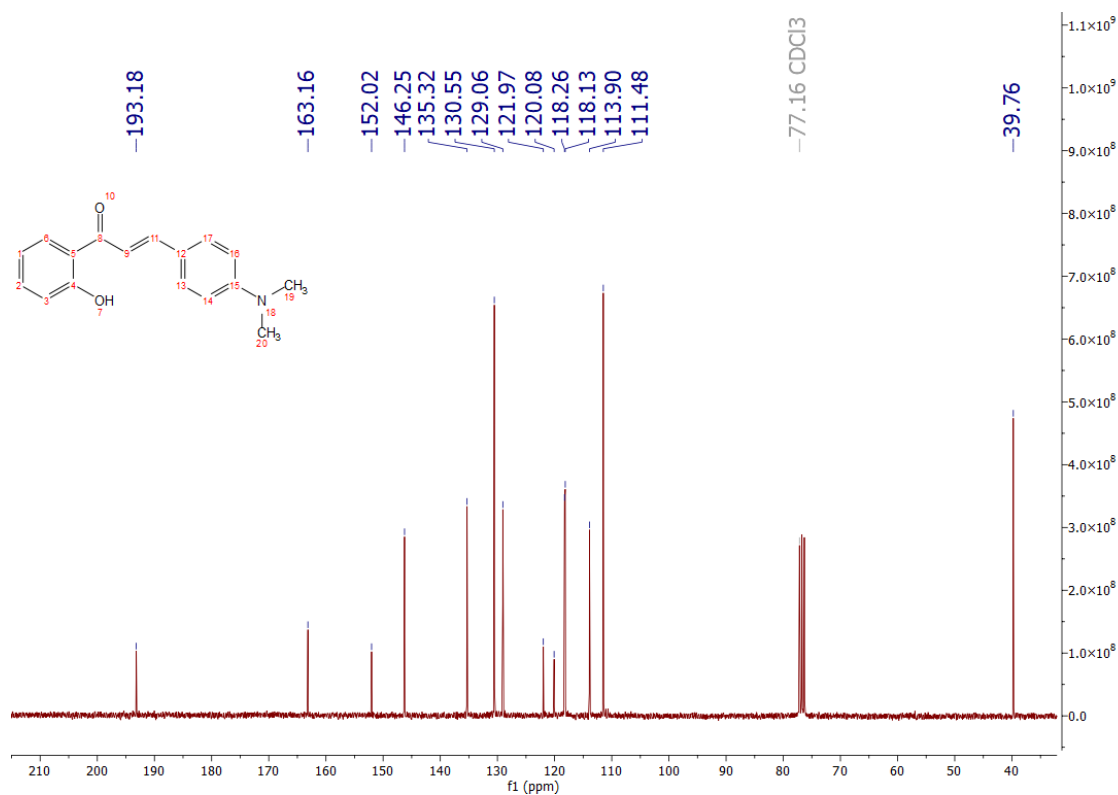

**Spectra 12:** <sup>13</sup>C NMR of compound **2c**



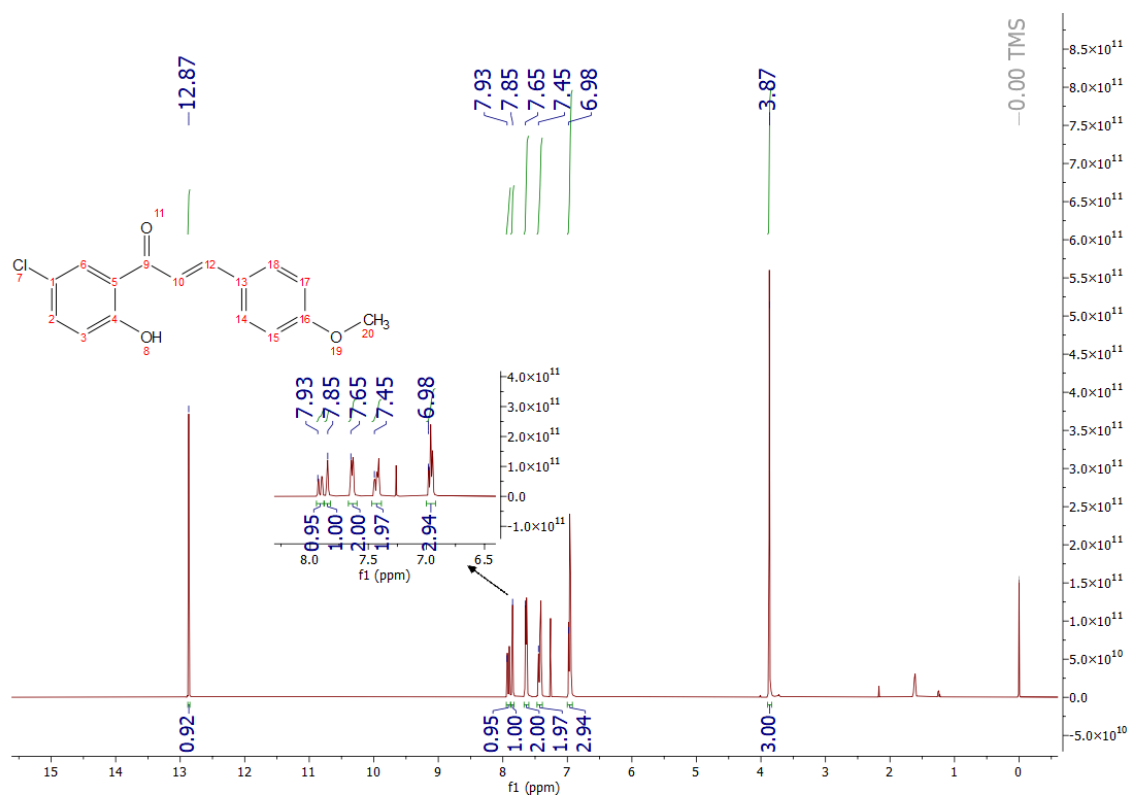

**Spectra 13:** <sup>1</sup>H NMR of compound **3a**

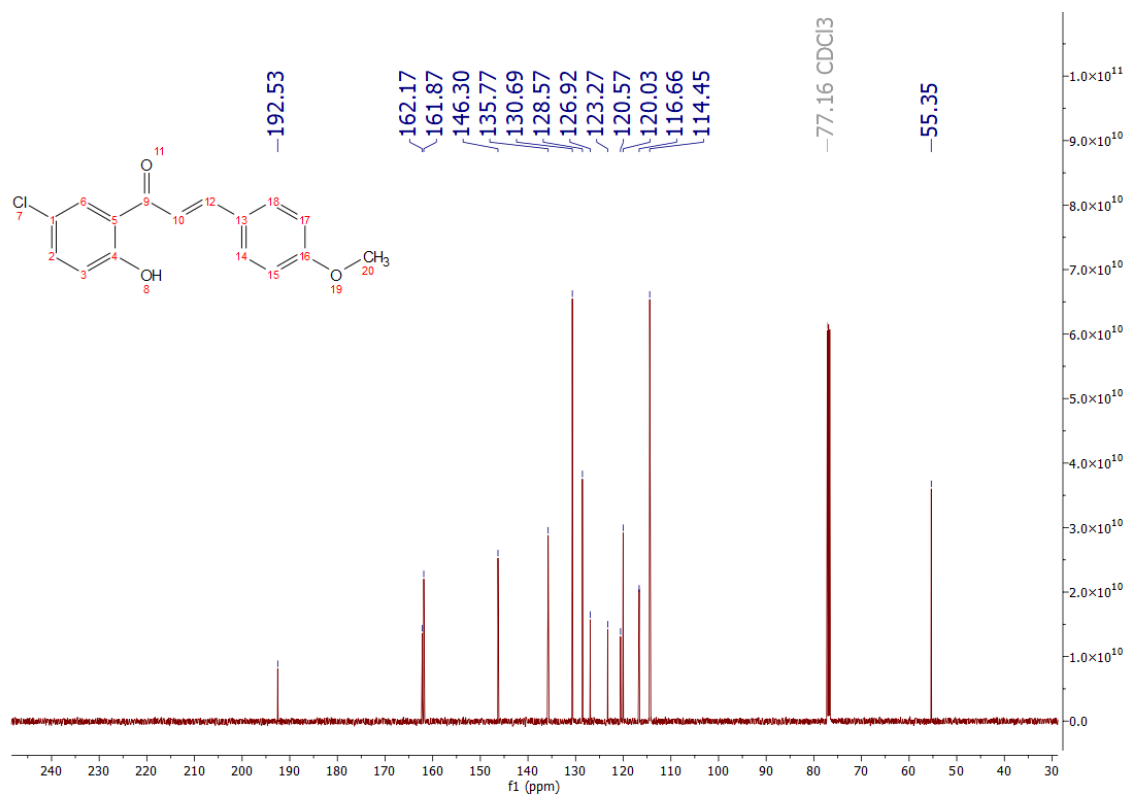

**Spectra 14:** <sup>13</sup>C NMR of compound **3a**

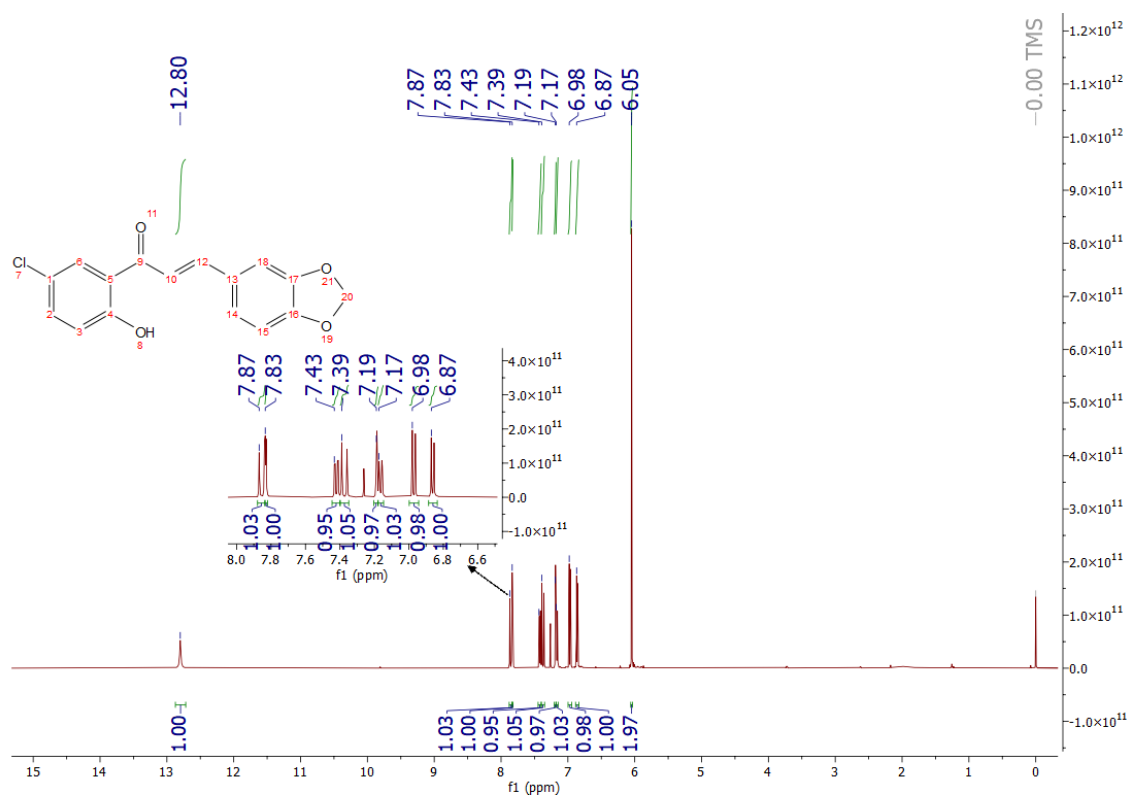

**Spectra 15:** <sup>1</sup>H NMR of compound **3b**

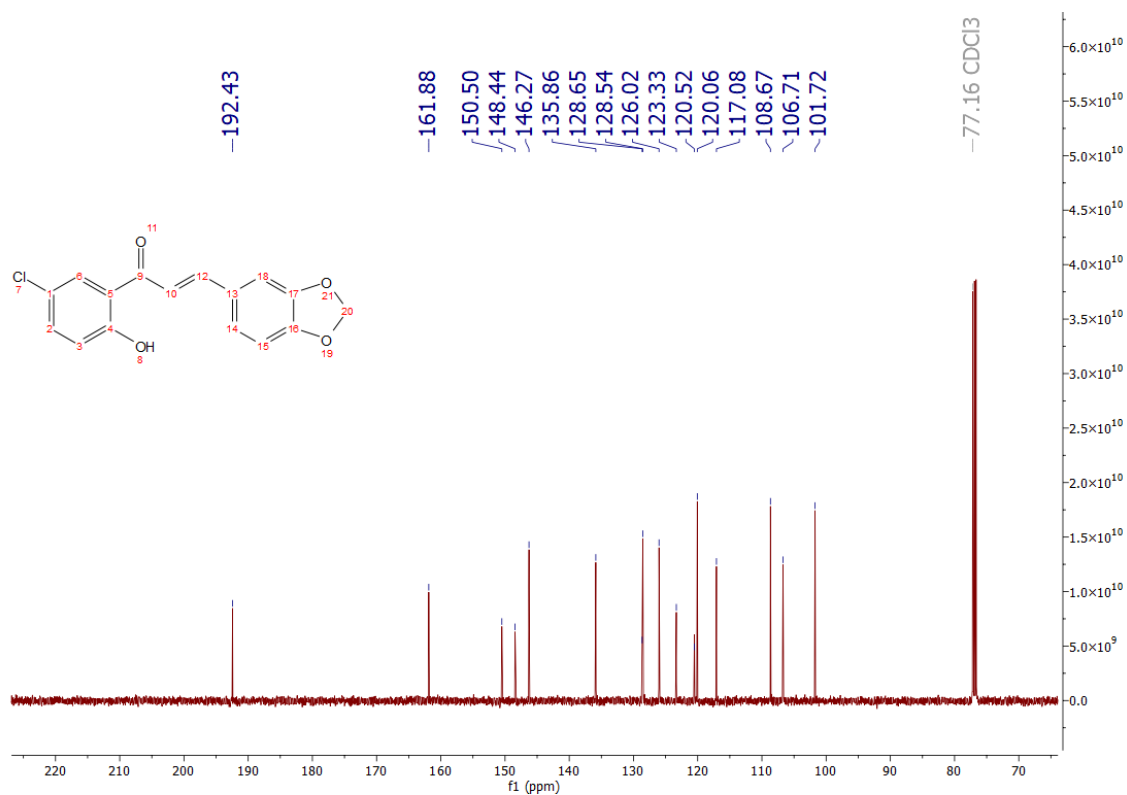

**Spectra 16:** <sup>13</sup>C NMR of compound **3b**

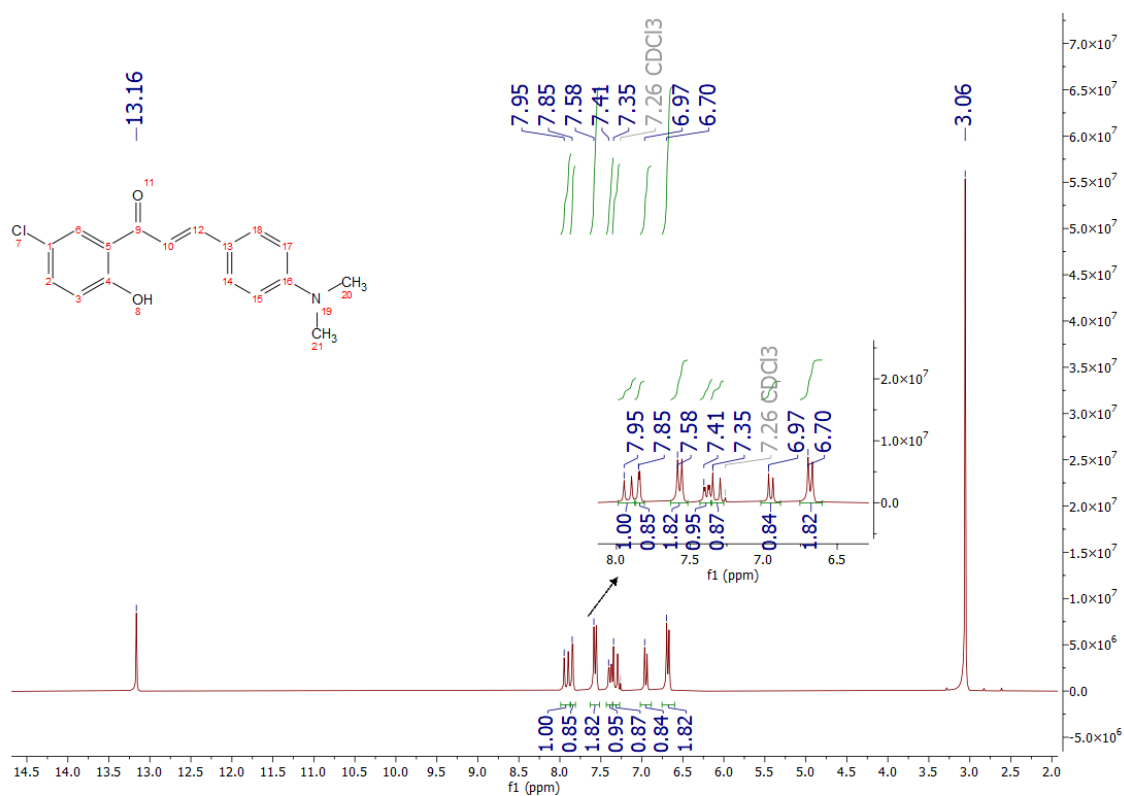

Spectra 17: <sup>1</sup>H NMR of compound 3c

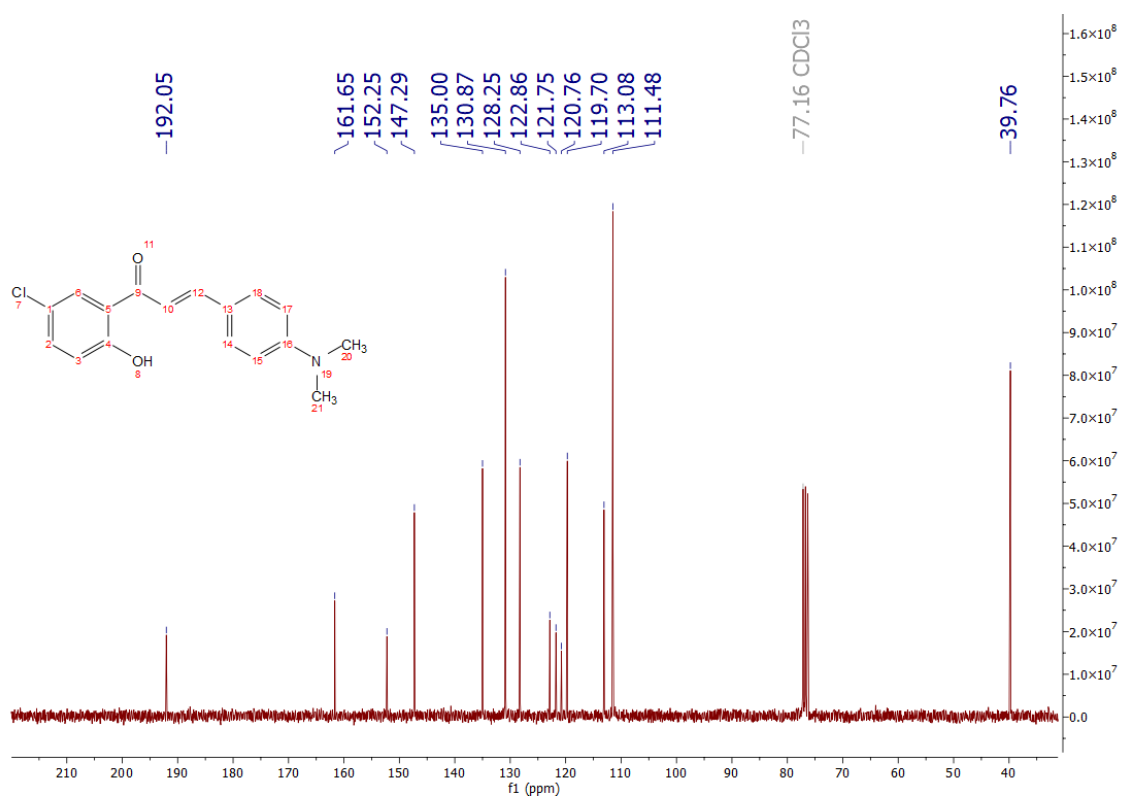

Spectra 18: <sup>13</sup>C NMR of compound 3c

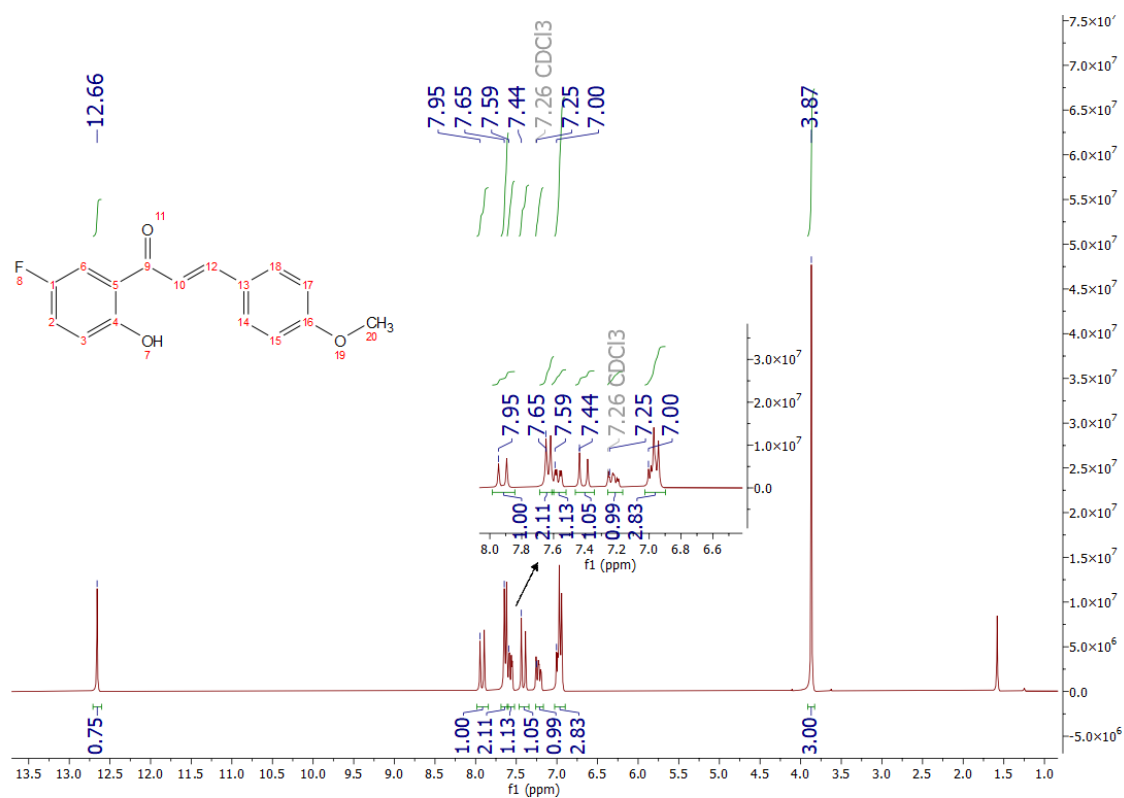

**Spectra 19:** <sup>1</sup>H NMR of compound **4a**

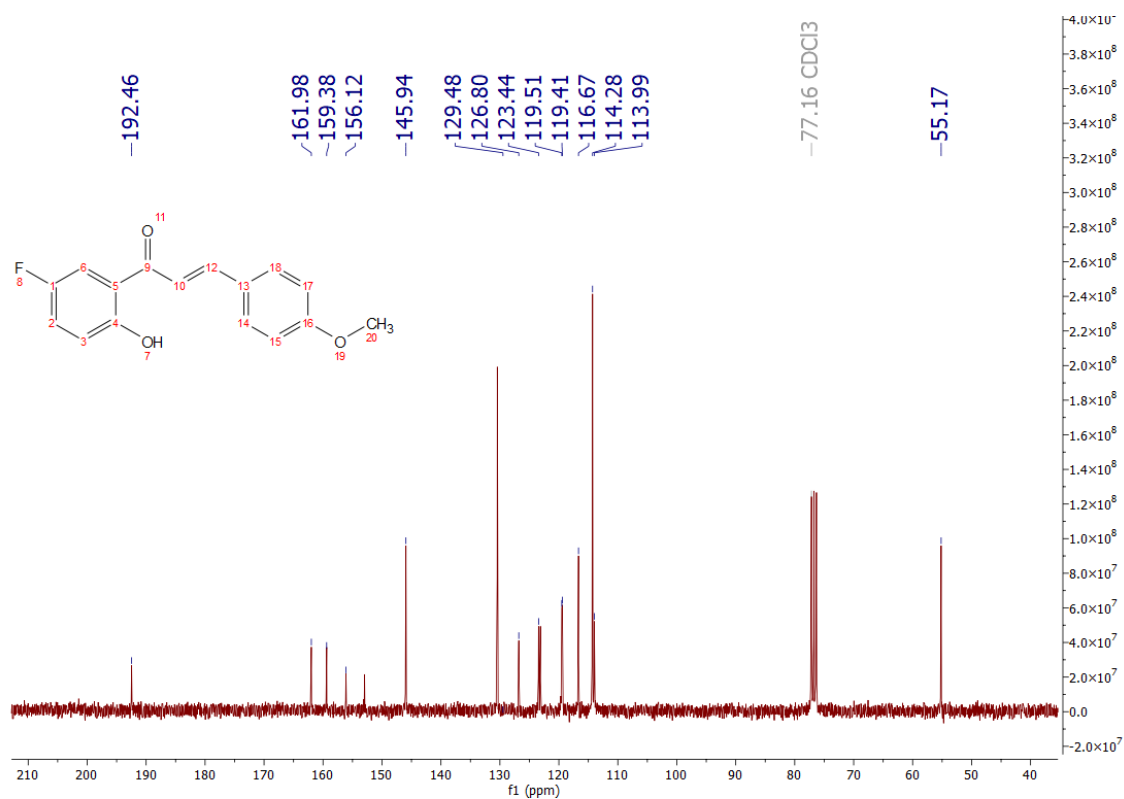

**Spectra 20:** <sup>13</sup>C NMR of compound **4a**

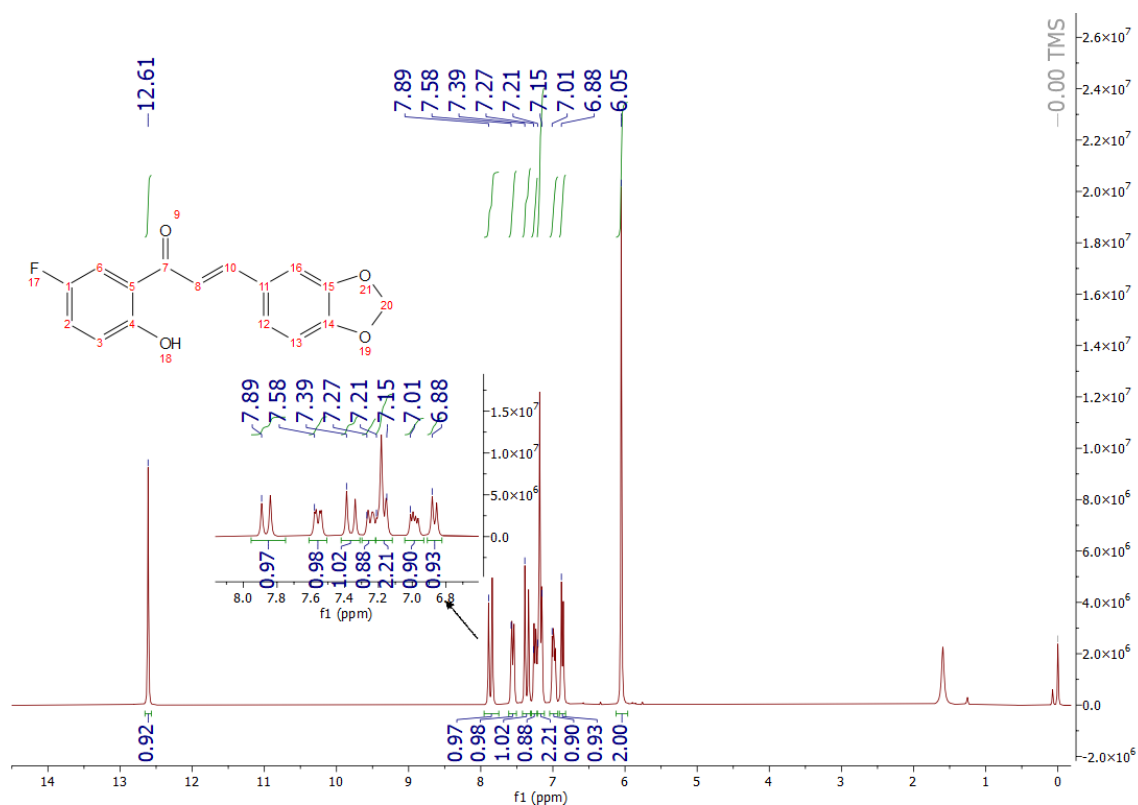

**Spectra 21:** <sup>1</sup>H NMR of compound **4b**

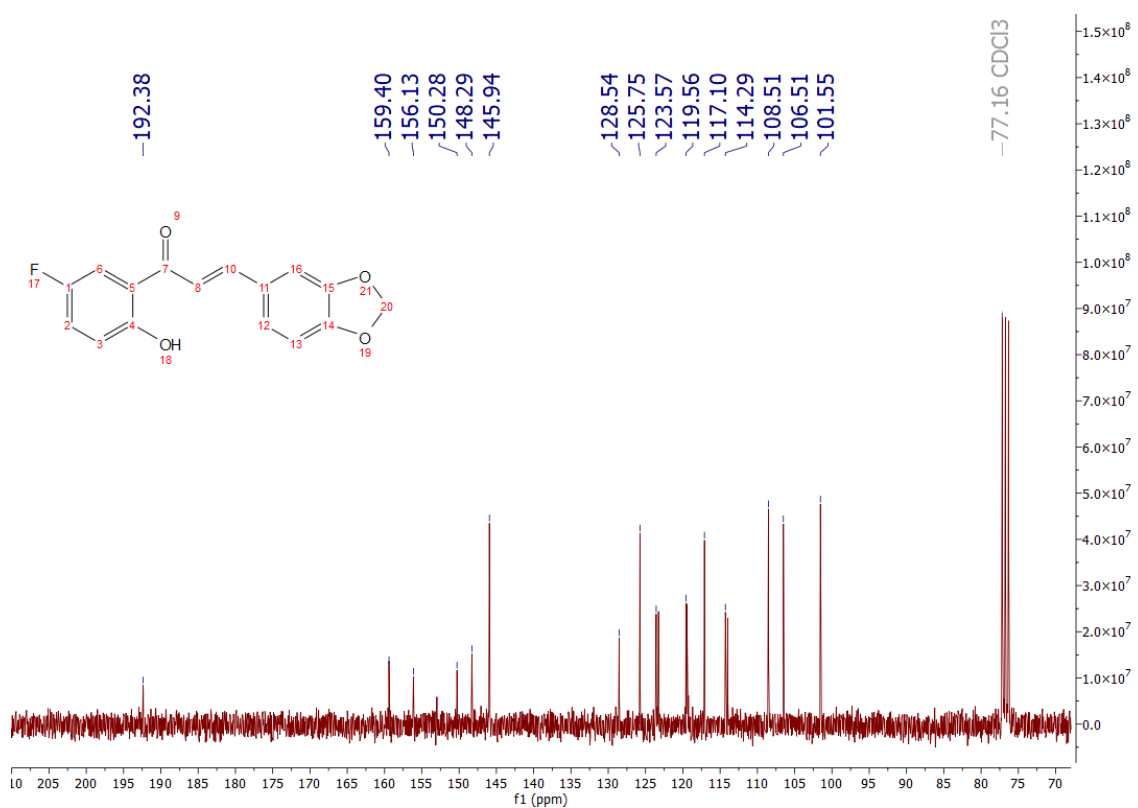

**Spectra 22:** <sup>13</sup>C NMR of compound **4b**

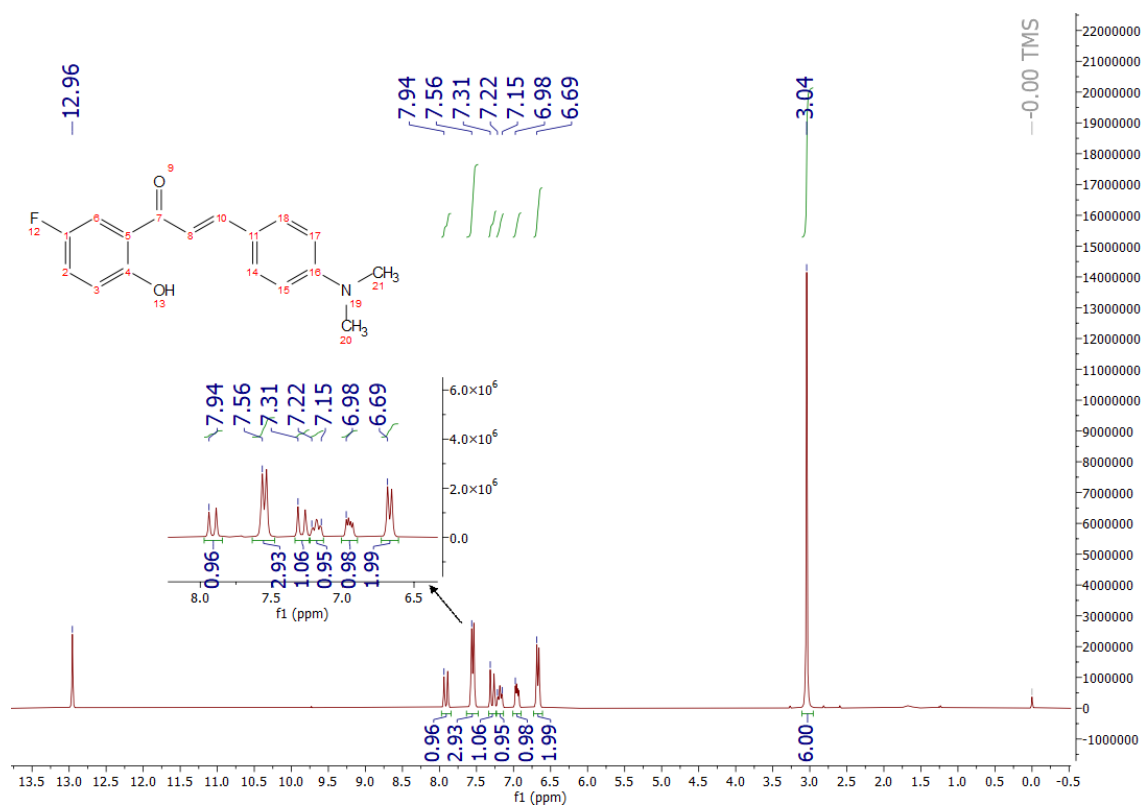

**Spectra 23:** <sup>1</sup>H NMR of compound **4c**

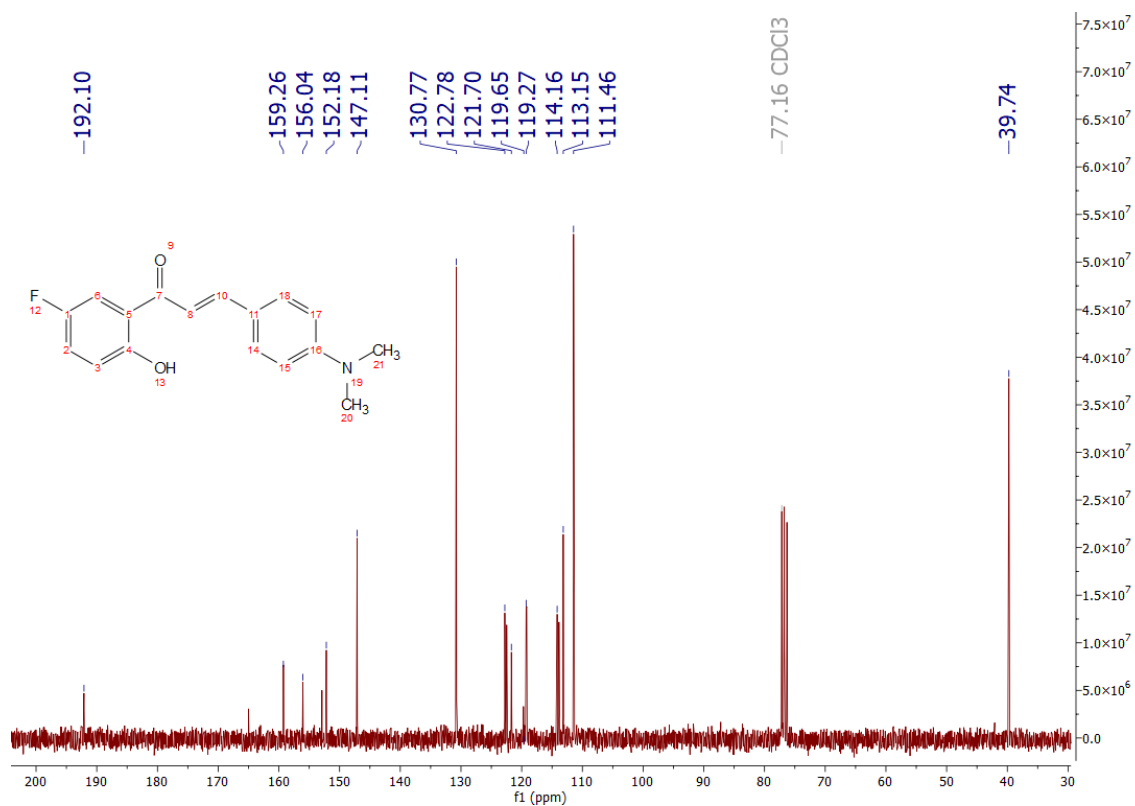

**Spectra 24:** <sup>13</sup>C NMR of compound **4c**

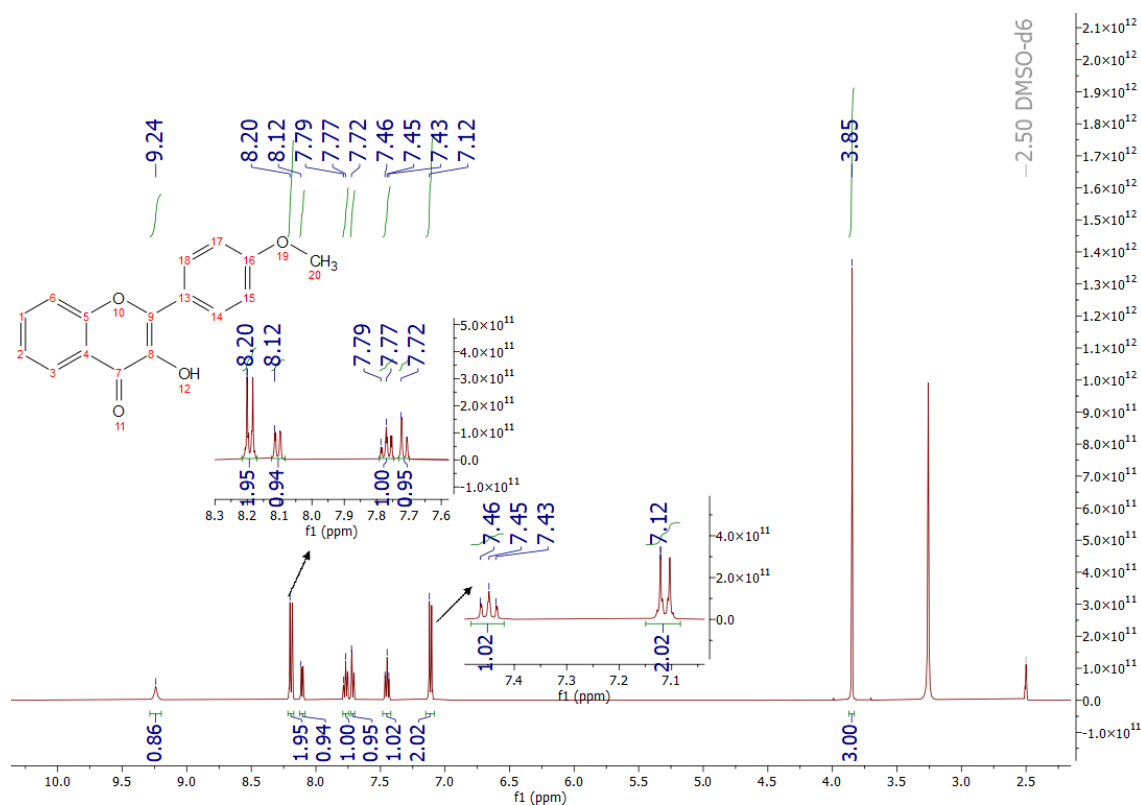

**Spectra 25:** <sup>1</sup>H NMR of compound **f12a**

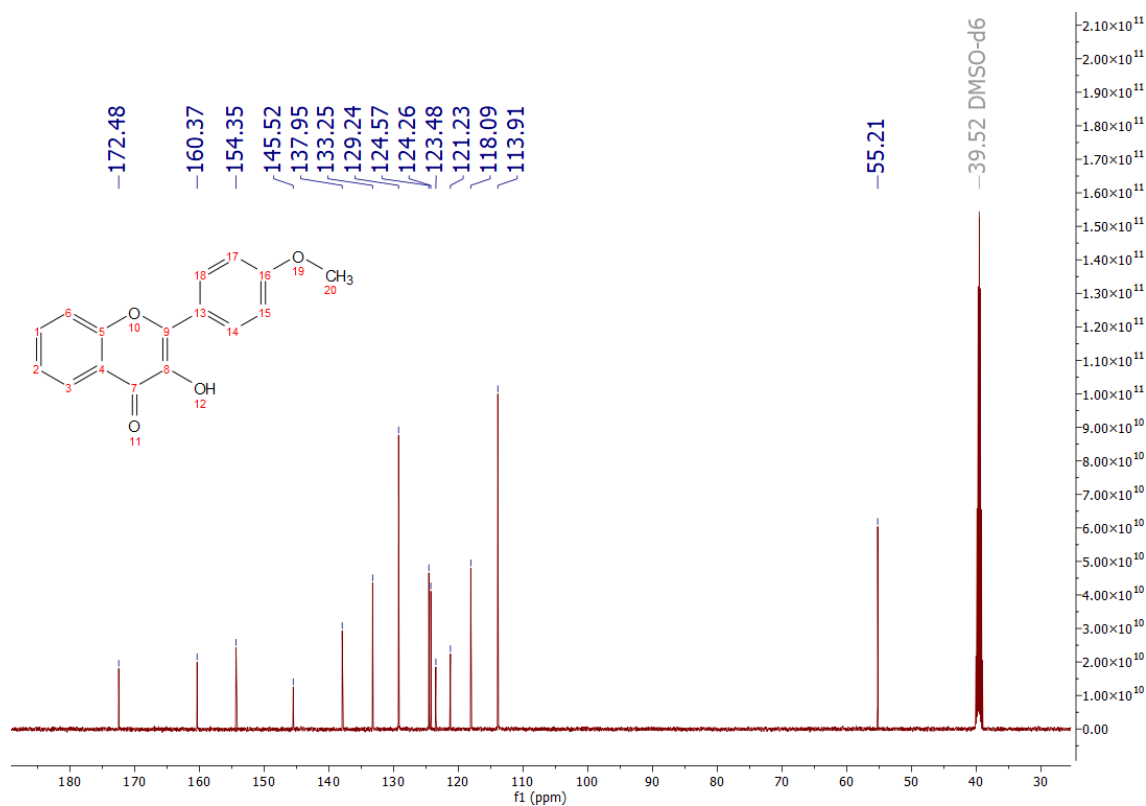

**Spectra 26:** <sup>13</sup>C NMR of compound **f12a**

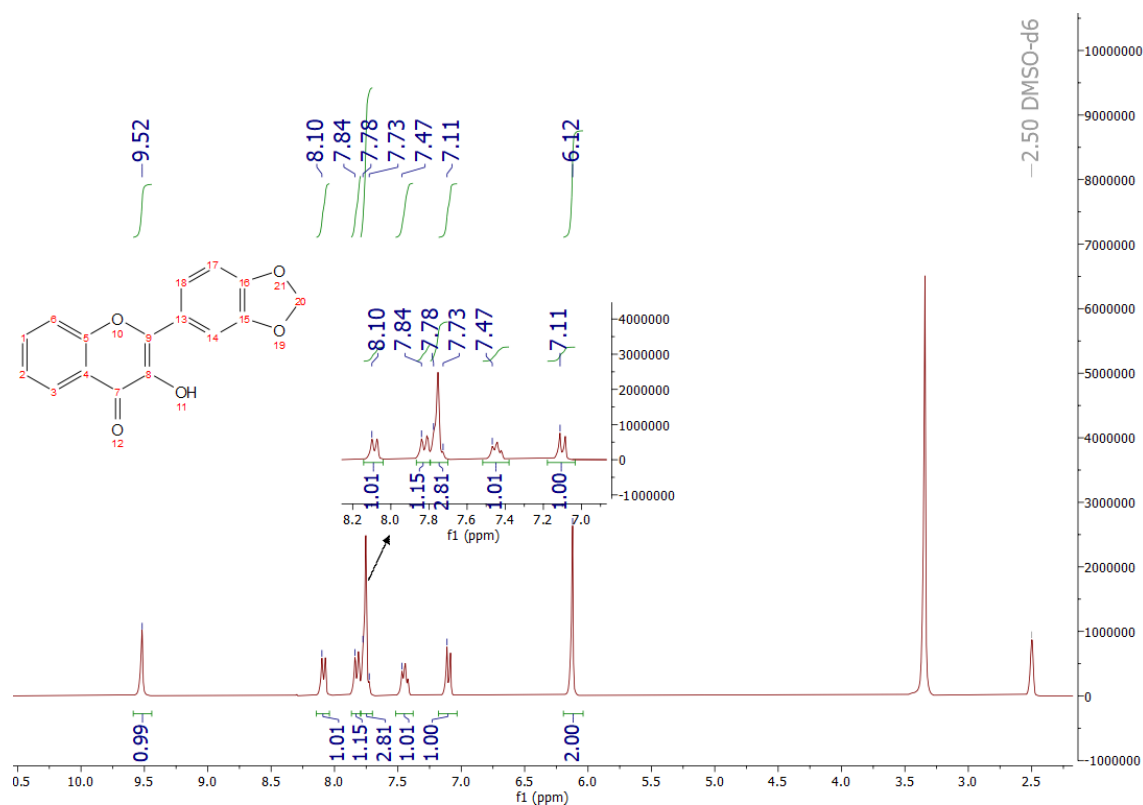

**Spectra 27:** <sup>1</sup>H NMR of compound **f1b**

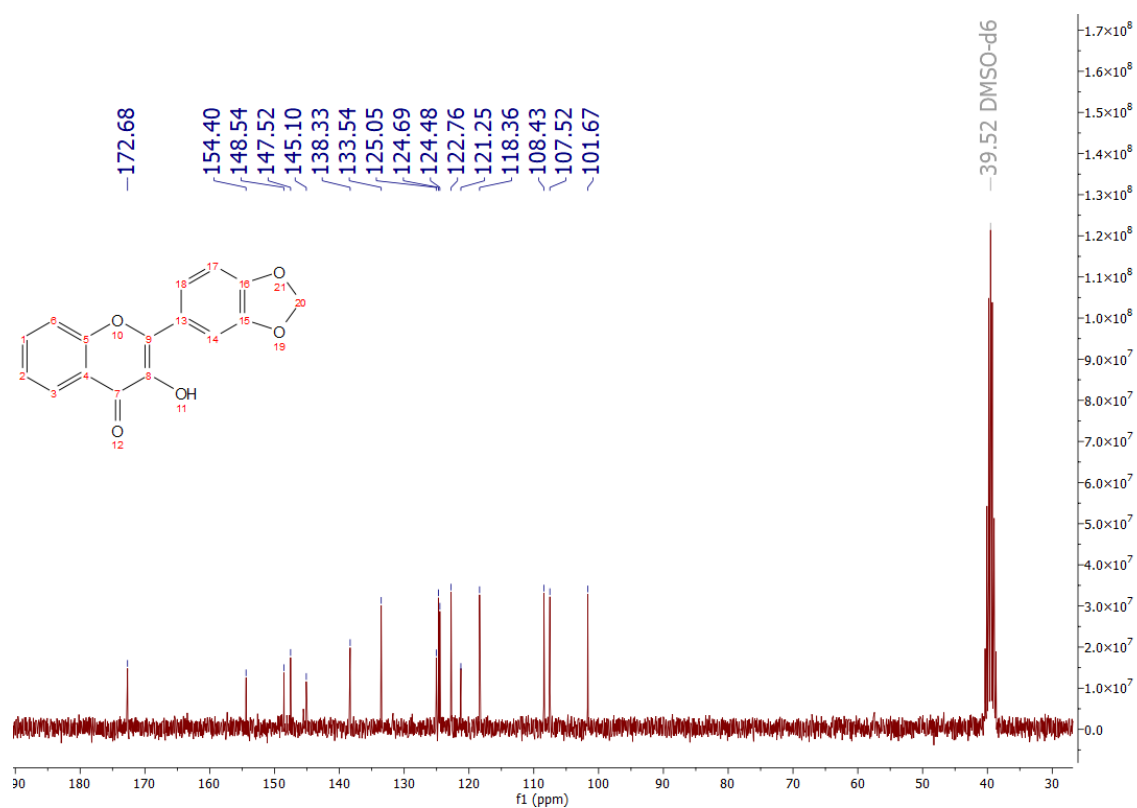

**Spectra 28:** <sup>13</sup>C NMR of compound **f1b**



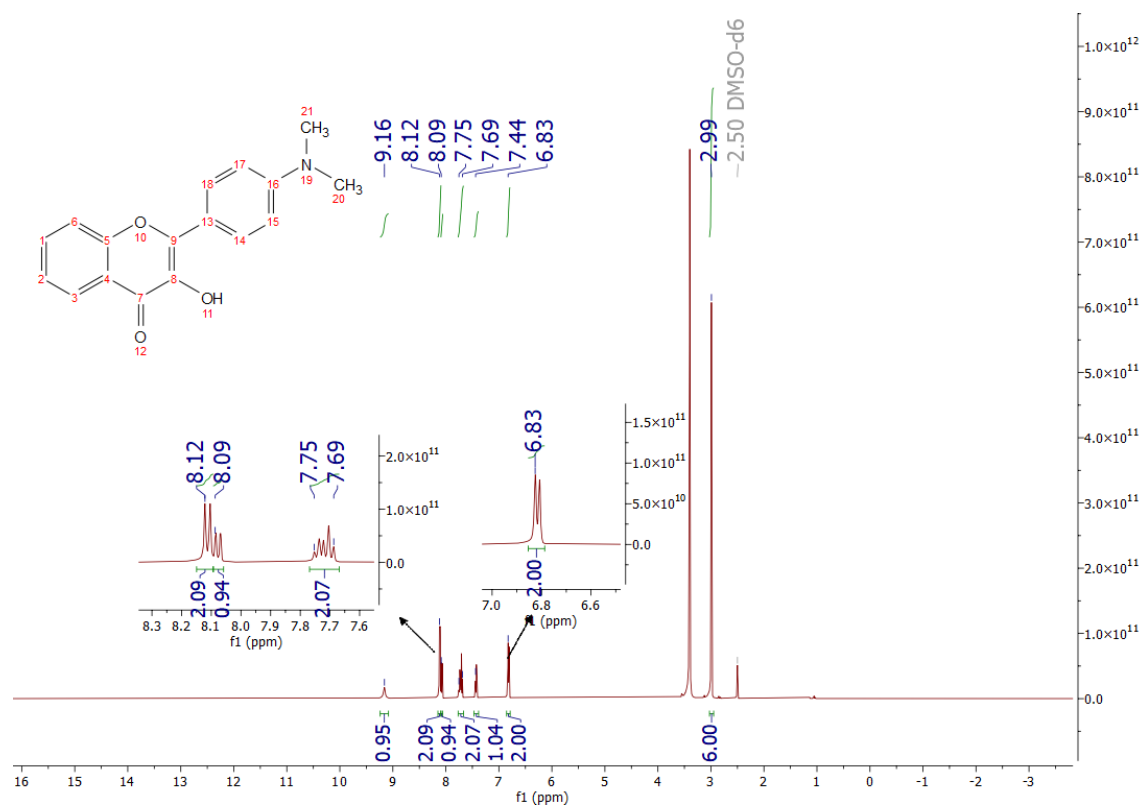

**Spectra 29:** <sup>1</sup>H NMR of compound **f1c**

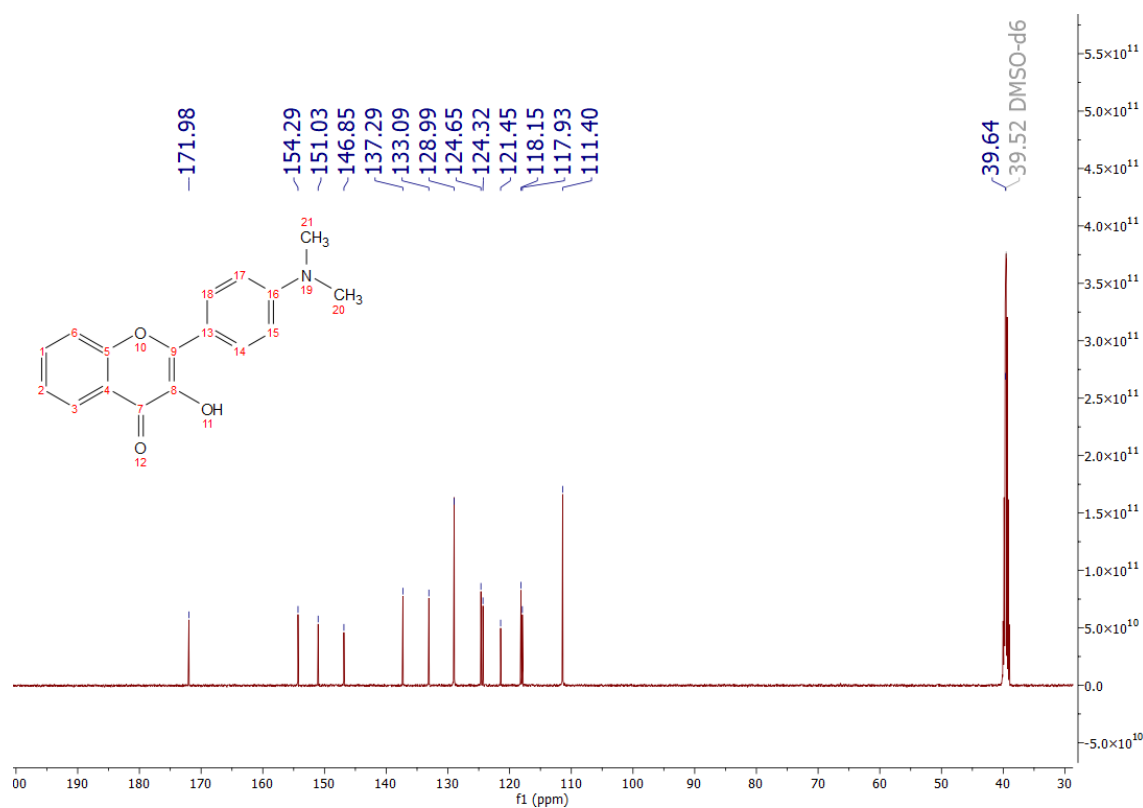

**Spectra 30:** <sup>13</sup>C NMR of compound **f12c**

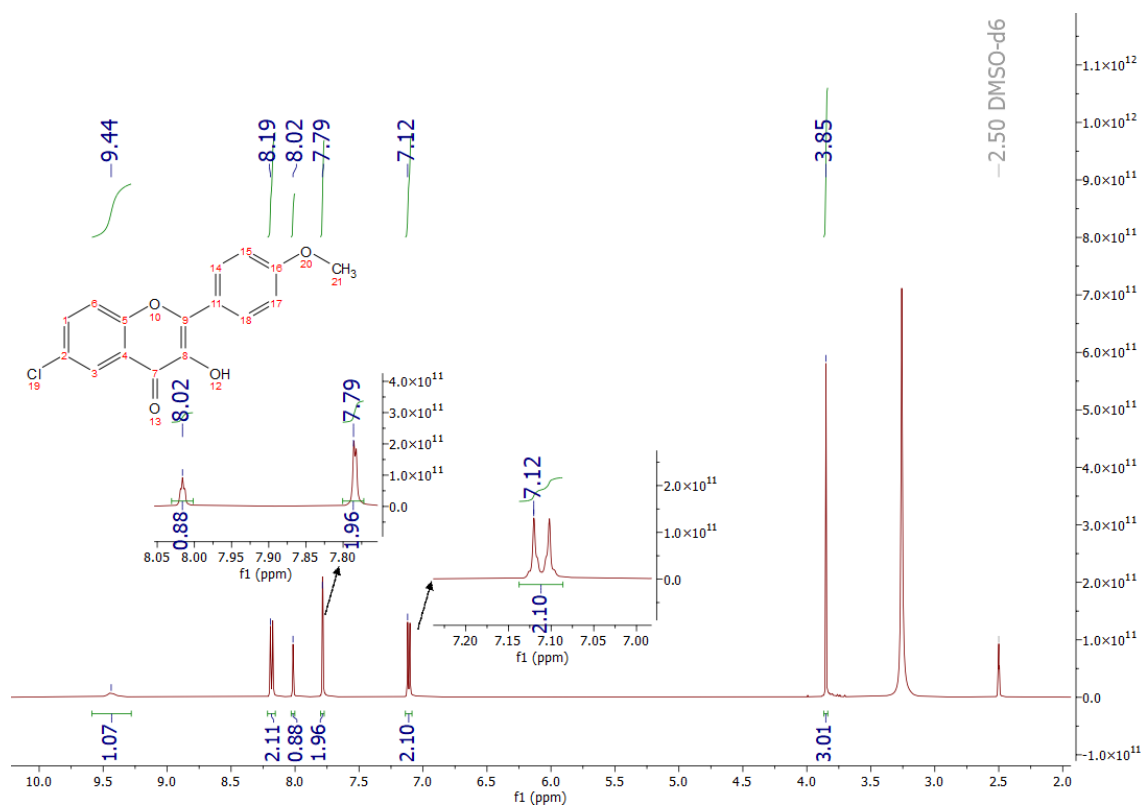

**Spectra 31:  $^1\text{H}$  NMR of compound **f3a****

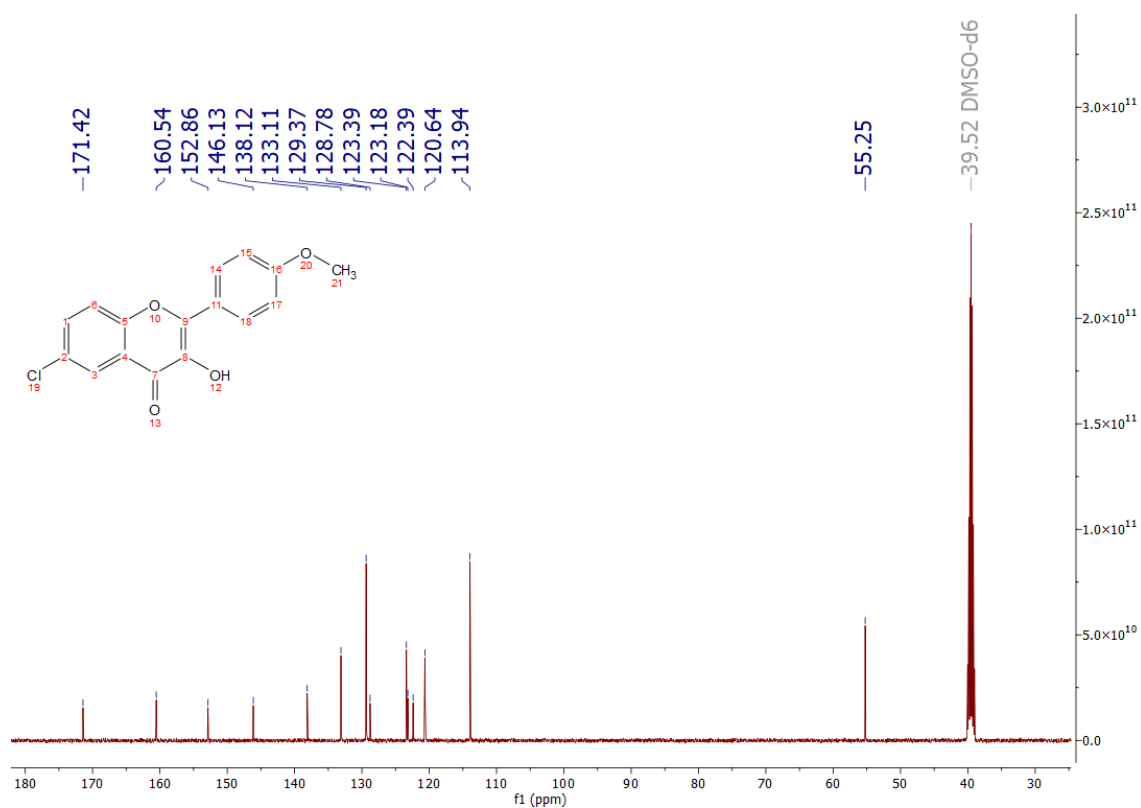

**Spectra 32:  $^{13}\text{C}$  NMR of compound **f13a****

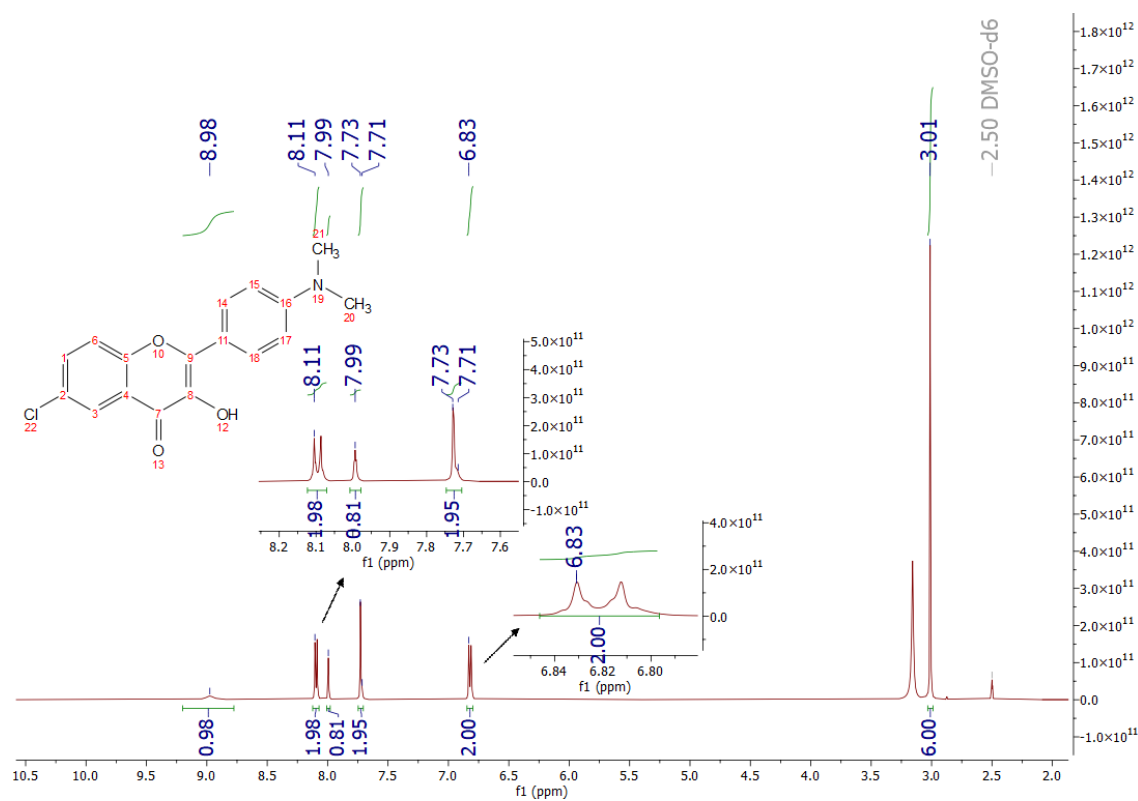

**Spectra 33:** <sup>1</sup>H NMR of compound f3c

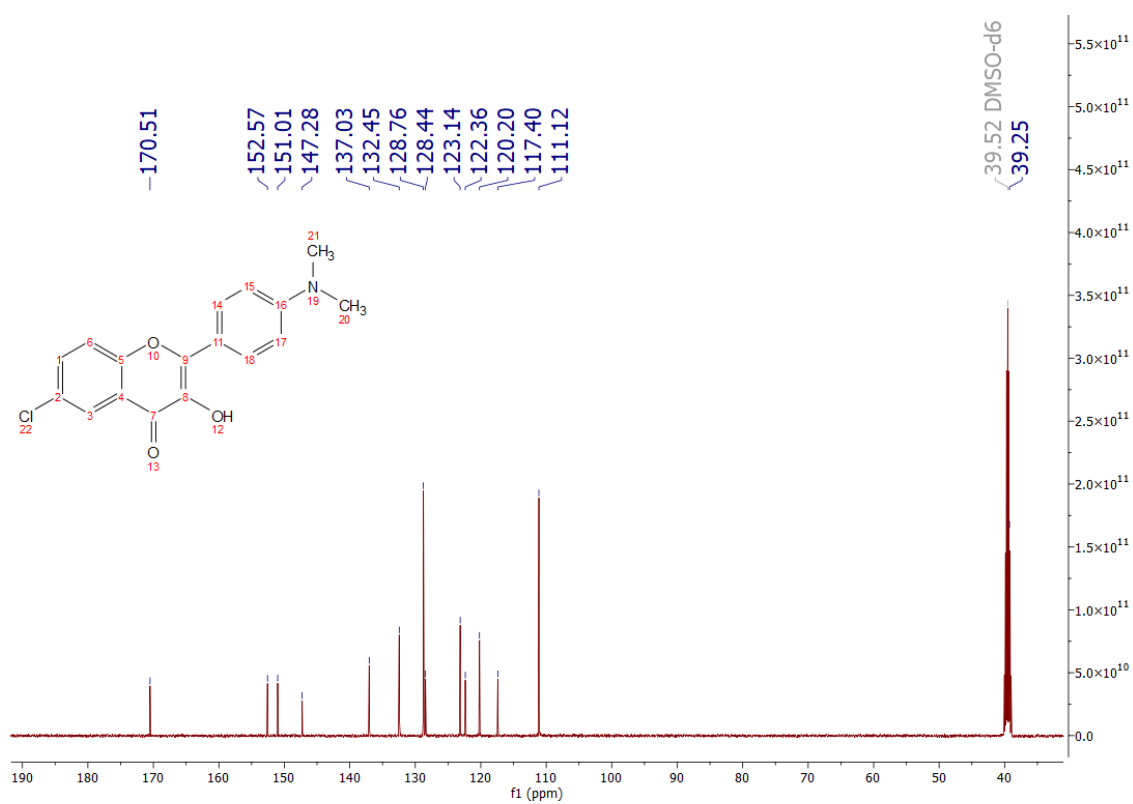

**Spectra 34:** <sup>13</sup>C NMR of compound f13c
